# Supplementary material for: Sexual behaviours and sexual health outcomes among young adults with limiting disabilities: findings from third British National Survey of Sexual Attitudes and Lifestyles (Natsal-3)
Source: PubMed Central journal article supplement (PMC6124606; doi:10.1136/bmjopen-2017-019219), 2018-07-05
Supplement: bmjopen-2017-019219.draft_revisions.pdf [file bmjopen-2017-019219.draft_revisions.pdf]

# BMJ Open

BMJ Open is committed to open peer review. As part of this commitment we make the peer review history of every article we publish publicly available.

When an article is published we post the peer reviewers' comments and the authors' responses online. We also post the versions of the paper that were used during peer review. These are the versions that the peer review comments apply to.

The versions of the paper that follow are the versions that were submitted during the peer review process. They are not the versions of record or the final published versions. They should not be cited or distributed as the published version of this manuscript.

BMJ Open is an open access journal and the full, final, typeset and author-corrected version of record of the manuscript is available on our site with no access controls, subscription charges or pay-per-view fees (<http://bmjopen.bmj.com>).

If you have any questions on BMJ Open's open peer review process please email [info.bmjopen@bmj.com](mailto:info.bmjopen@bmj.com)

# BMJ Open

## Sexual behaviours and sexual health outcomes among young adults with limiting disabilities: findings from third British National Survey of Sexual Attitudes and Lifestyles (Natsal-3).

|                                 |                                                                                                                                                                                                                                                                                                                                                                                                                                                                                                                                                                                                                                                                                                                                               |
|---------------------------------|-----------------------------------------------------------------------------------------------------------------------------------------------------------------------------------------------------------------------------------------------------------------------------------------------------------------------------------------------------------------------------------------------------------------------------------------------------------------------------------------------------------------------------------------------------------------------------------------------------------------------------------------------------------------------------------------------------------------------------------------------|
| Journal:                        | <i>BMJ Open</i>                                                                                                                                                                                                                                                                                                                                                                                                                                                                                                                                                                                                                                                                                                                               |
| Manuscript ID                   | bmjopen-2017-019219                                                                                                                                                                                                                                                                                                                                                                                                                                                                                                                                                                                                                                                                                                                           |
| Article Type:                   | Research                                                                                                                                                                                                                                                                                                                                                                                                                                                                                                                                                                                                                                                                                                                                      |
| Date Submitted by the Author:   | 30-Aug-2017                                                                                                                                                                                                                                                                                                                                                                                                                                                                                                                                                                                                                                                                                                                                   |
| Complete List of Authors:       | Holdsworth, Elizabeth; London School of Hygiene and Tropical Medicine Faculty of Public Health and Policy, Health Services Research and Policy<br>Trifonova, Viktoriya ; University College London, Department of Infection & Population Health<br>Tanton, Clare; University College London, Research Department of Infection & Population Health<br>Kuper, Hannah; The London School of Hygiene & Tropical Medicine, Clinical Research<br>Datta, Jessica; London School of Hygiene and Tropical Medicine, SEHR<br>Macdowall, Wendy; London School of Hygiene & Tropical Medicine, Centre for Sexual and Reproductive Health Research<br>Mercer, Catherine; University College London, Research Department of Infection and Population Health |
| <b>Primary Subject Heading</b>: | Public health                                                                                                                                                                                                                                                                                                                                                                                                                                                                                                                                                                                                                                                                                                                                 |
| Secondary Subject Heading:      | Sexual health                                                                                                                                                                                                                                                                                                                                                                                                                                                                                                                                                                                                                                                                                                                                 |
| Keywords:                       | SEXUAL MEDICINE, PUBLIC HEALTH, REPRODUCTIVE MEDICINE                                                                                                                                                                                                                                                                                                                                                                                                                                                                                                                                                                                                                                                                                         |
|                                 |                                                                                                                                                                                                                                                                                                                                                                                                                                                                                                                                                                                                                                                                                                                                               |

1  
2  
3  
4 **Title: Sexual behaviours and sexual health outcomes among young adults with limiting**  
5 **disabilities: findings from third British National Survey of Sexual Attitudes and Lifestyles**  
6 **(Natsal-3).**  
7  
8

9  
10  
11 **Authors:** Elizabeth Holdsworth<sup>1</sup>, Viktoriya Trifonova<sup>2</sup>, Clare Tanton<sup>2</sup>, Hannah Kuper<sup>1</sup>, Jessica  
12 Datta<sup>1</sup>, Wendy Macdowall<sup>1</sup>, Catherine H. Mercer<sup>2</sup>  
13

14  
15  
16 <sup>1</sup>London School of Hygiene & Tropical Medicine, London, UK.  
17

18  
19 <sup>2</sup>University College London, London, UK  
20

21 **Corresponding author:** Elizabeth Holdsworth, Health Service Research and Policy  
22 Department, London School of Hygiene & Tropical Medicine, 15-17 Tavistock Place, London,  
23 WC1H 9SH. [Elizabeth.Holdsworth@lshtm.ac.uk](mailto:Elizabeth.Holdsworth@lshtm.ac.uk). Tel: +44 (0)20 7958 8347. Fax: +44 (0)20  
24 7927 2701.  
25  
26  
27

28  
29 **Key words:** Reproductive health, sexual behaviour, public health, people with disabilities  
30

31  
32 **Word count:** 3952  
33  
34  
35  
36  
37  
38  
39  
40  
41  
42  
43  
44  
45  
46  
47  
48  
49  
50  
51  
52  
53  
54  
55  
56  
57  
58  
59  
60

**Abstract:****OBJECTIVE:**

To explore whether the sexual behaviours and sexual health outcomes of young adults with self-reported disabilities that they perceive limit their activities ('limiting disability'), differ from those without disability.

**DESIGN:**

Complex survey analyses of cross-sectional probability sample survey data collected between September 2010 and August 2012 using computer-assisted personal interviewing and computer-assisted self-interview.

**SETTING:**

British general population.

**PARTICIPANTS:**

7435 women and men aged 17-34 years, resident in private households in Britain, interviewed for the third National Survey of Sexual Attitudes and Lifestyles (Natsal-3).

**MAIN OUTCOME MEASURES:**

Self-reported sexual behaviour and sexual health outcomes.

**RESULTS:**

Approximately one-in-ten participants reported having a limiting disability. Sexual behaviours were similar between those with limiting disability and those without, with a few exceptions. Women and men with limiting disability were less likely to report having sexual partner(s) (past year, odds ratios adjusted for age and education, AORs: 0.69, 0.60, respectively). Women with limiting disability were more likely to report having same-sex partner(s) in the past 5 years (AOR: 2.20). Differences were seen in sexual health outcomes, especially amongst women; those with limiting disability were more likely to report having

1  
2  
3 experienced non-volitional sex (ever, AOR: 3.19), STI diagnoses (ever, AOR: 1.43), and  
4 sought help/advice regarding their sex life (past year, AOR: 1.65). Both women and men  
5 with limiting disability were more likely to feel distressed/worried about their sex life than  
6 those without limiting disability (AORs: 1.52, 1.69, respectively).  
7  
8  
9

### 10 11 **CONCLUSIONS:**

12  
13  
14 Young adults with limiting disability, especially women, are more likely to report adverse  
15 sexual health outcomes than those without, despite comparatively few behavioural  
16 differences. It is important to ensure that people with disabilities are included in sexual  
17 health promotion and service planning, and targeted policy and programme interventions  
18 are needed to address negative sexual health outcomes disproportionately experienced by  
19 people with disabilities.  
20  
21  
22  
23  
24  
25  
26  
27  
28  
29  
30  
31  
32  
33  
34  
35  
36  
37  
38  
39  
40  
41  
42  
43  
44  
45  
46  
47  
48  
49  
50  
51  
52  
53  
54  
55  
56  
57  
58  
59  
60

### Strengths and limitations of this study

- This paper presents the results of the analysis of a large scale, nationally representative survey, which achieved a response rate in line with other major social surveys completed in Britain around the same time
- It is one of few quantitative studies to explore whether sexual behaviour and sexual health outcomes differ between people with limiting disability and those with no disability, and the only one we know of to date in Britain
- A strength of Natsal-3 is that it used CAPI and specifically CASI to minimise reporting bias for more sensitive questions
- As a cross-sectional survey, chronology cannot always be determined and nor can causality in the associations we show be inferred, e.g. We have no information about the duration of disability, and whether or not a participant's disability preceded their first heterosexual intercourse.

## Introduction

It is estimated that there are one billion people living with a disability worldwide (1), and in Britain there are over eleven million people with a limiting long-term illness, impairment or disability, equating to almost one in six of the population (2). From both human rights and public health perspectives, it is important that sexual and reproductive health (SRH) services are inclusive of this large group, since sexual health and sexual satisfaction are recognised as significant predictors of quality of life and general life satisfaction (3,4). However, it is argued that the sexuality and sexual health of people with disabilities have traditionally been neglected (5,6). This may be a result of misconceptions that disabled people are asexual (6–8) or because the sexual well-being of people with disabilities is of less concern than rehabilitation and other health priorities (9,10). This is despite evidence from qualitative research highlighting the same need for sexual health services among those with disabilities as in the wider population (4). Negative experiences with healthcare professionals are commonly reported by people with disabilities, these include a failure to discuss sex because professionals do not think the topic pertinent (8). Findings also identify unmet need for support for problems with sexual function (11,12) and sexual satisfaction (4). However, there is an absence of reliable, empirical evidence from large-scale, population-level surveys that explore the sexual lifestyles and experiences of disabled people in Britain.

Britain's third National Survey of Sexual Attitudes and Lifestyles (Natsal-3), a probability sample survey, offers an opportunity to address these evidence gaps. Earlier analyses of Natsal-3 data highlighted differences in sexual experiences between people with disabilities and those without including the increased prevalence of 'non-volitional' or 'non-consensual' sex reported by people with disabilities (13), and the association between poor health and decreased sexual activity and satisfaction (14). This paper seeks to explore in greater depth the sexual behaviours and sexual health outcomes reported by people with and without limiting disabilities, specifically among young people as the age group at the highest risk of negative sexual health outcomes (15–17).

## Methods

### Participant and procedures

Natsal-3 was a stratified probability sample survey of 15,162 men and women aged 16 to 74 years, resident in households in Britain, who were interviewed 2010-2012. Details of the methodology are described in detail elsewhere (18), and the questionnaire and technical report are available online ([www.natsal.ac.uk](http://www.natsal.ac.uk)). Participants completed the survey through a combination of face-to-face computer-assisted personal interview (CAPI) and computer-assisted self-interview (CASI) for the more sensitive questions.

In the CAPI section of the interview, all participants were asked *“Do you have any long-standing illness, disability or infirmity?”* in which *“long-standing”* was defined as *“anything that has troubled you over a period of time, or that is likely to affect you over a period of time”*. Participants who answered *“yes”* were routed to the question: *“Does this limit your activities in any way?”*. Participants who reported *“yes”* were defined for the purposes of this analysis as having *“limiting disability”*. In this paper we compared those reporting limiting disability with those reporting no long-standing illness or disability. This means that our comparative analyses exclude participants reporting a non-limiting disability, because they cannot easily be categorised either as *“disabled”* or *“non-disabled”* according to the prevailing conceptualization of disability (19).

To obtain information about self-reported clinical diagnoses of a range of health conditions, interviewers in the CAPI showed participants cards listing a number of different conditions and asked whether they had been diagnosed with any of those listed. These included mental and physical health conditions (e.g. depression, arthritis, cardiac diseases, diabetes, epilepsy, broken hip or pelvis, backache or bone or muscle disease) lasting for more than 3 months in the past year.

Participants were also asked about their first sexual experiences in the CAPI through showcards, and then in the CASI they were asked questions about their experience of sexual practices, numbers of sexual partners in different timeframes, their recent partnerships,



1  
2  
3 sexual function and sexual health, including STI diagnosis. The interview concluded with  
4 another CAPI, which included standard demographic questions about educational  
5 attainment, employment, sexual identity and ethnicity.  
6  
7

8  
9 The overall estimated response rate to Natsal-3 was 57.7%, while among those aged 16-34,  
10 it was estimated as 64.8% (20). For this analysis, we focused on participants aged 17-34,  
11 excluding 16 year olds, because we considered it important to adjust our analyses for  
12 education level, at least in terms of whether participants had any academic qualifications  
13 and/or are continuing to study for qualifications typically gained aged 17+.  
14  
15  
16  
17

18  
19 The Natsal-3 study was approved by the Oxfordshire Research Ethics Committee A  
20 (reference: 10/H0604/27). Participants provided oral consent for interviews.  
21  
22

### 23 24 **Statistical analysis**

25  
26 We completed statistical analyses using the survey functions of STATA (version 14.1) to take  
27 account of the stratification, weighting and clustering of the Natsal-3 dataset. The data were  
28 weighted to adjust for the unequal probabilities of selection and non-response, and  
29 corrected for differences in gender, age and regional distribution according to the UK 2011  
30 census, so that the data are broadly representative of the resident general population in  
31 Britain (20).  
32  
33  
34  
35  
36  
37

38  
39 We initially estimated the prevalence of reporting a limiting disability among all young  
40 people, and also the prevalence of reporting a disability that was *not* perceived as limiting.  
41 We then examined the prevalence of the health conditions that were asked about in Natsal-  
42 3 according to whether participants reported a limiting disability or no disability at all, in  
43 order to provide context, although we recognise that these conditions may or may not be  
44 the cause of participants' limiting disability. Our binary variable of reporting "limiting  
45 disability" or "no disability" was then initially treated as a dependent (outcome) variable to  
46 examine how prevalence varies by key socio-demographic factors. In subsequent analyses  
47 we used this variable as an independent (response) variable to consider how reporting  
48 sexual behaviours and sexual health-outcomes vary for those with a limiting disability in  
49 comparison to those without. We present prevalence estimates and adjusted odds ratios  
50  
51  
52  
53  
54  
55  
56  
57  
58  
59  
60

1  
2  
3 (AOR) and 95% confidence intervals. When examining the associations between socio-  
4 demographic variables and our measure of disability we used multivariable logistic  
5 regression to adjust only for age but, in subsequent tables, we also adjusted for education  
6 as a measure of individual-level socio-economic status, to control for its potentially  
7 confounding effects on the outcomes of interest.  
8  
9

### 10 11 12 **Role of funding source**

13  
14  
15 This research paper received no specific grant from any funding agency in the public,  
16 commercial or not-for-profit sectors. The Natsal-3 study was supported by grants from the  
17 Medical Research Council [G0701757]; and the Wellcome Trust [084840]; with contributions  
18 from the Economic and Social Research Council and Department of Health. The sponsors of  
19 the original Natsal-3 study had no role in study design, data collection, data analysis, data  
20 interpretation, or writing of this paper.  
21  
22  
23  
24  
25  
26

### 27 28 **Results**

#### 29 30 ***Prevalence of limiting disability and most commonly reported health conditions***

31  
32  
33 Of all participants aged 17-34, 11.0% (95% CI: 10.0%-12.1%) of women and 8.2% (95% CI:  
34 7.1%-9.4%) of men reported having an illness, disability or infirmity that limited their  
35 activities (Table 1). A further 9.9% (95% CI: 8.9%-10.9%) of all women and 8.1% (95% CI:  
36 7.1%-9.3%) of all men in this age group reported a disability that they did not perceive as  
37 limiting their activities (Data not shown). These participants with non-limiting disability (439  
38 women and 255 men) correspond to approximately half of all participants in this age range  
39 who reported a disability and are excluded from subsequent analyses. Overall, the majority  
40 of women and men with limiting disability reported having one or more physical and/or  
41 mental health condition (76.5% women; 71.8% men - conditions shown in Supplementary  
42 Table). Relative to those reporting no disability, mental health conditions were reported by  
43 a large proportion of those with limiting disability: 50% of women (AOR 5.19) and 45% of  
44 men (AOR 6.26). Depression was the most commonly reported mental health condition by  
45 men and women with limiting disability. Physical health conditions were also more  
46 frequently reported by those with limiting disability, with 50% of men (AOR 12.7) and 52%  
47  
48  
49  
50  
51  
52  
53  
54  
55  
56  
57  
58  
59  
60

1  
2  
3 of women (AOR 10.3) reporting one or more physical health condition. Having difficulty or  
4 being unable to walk up a flight of stairs, and having backache or bone or muscle disease for  
5 more than 3 months in the past year were the physical conditions most commonly reported  
6 by participants with limiting disability. Those with limiting disability had high levels of  
7 comorbidity with 40.6% of women and 39.9% of men with limiting disability reporting 2 or  
8 more physical and/or mental health conditions (AOR 19.2 and AOR 42.3 respectively).  
9

10  
11  
12  
13  
14  
15 ***Variation in the reporting of limiting disability by key sociodemographic characteristics***  
16 ***(Table 1)***  
17

18  
19 Prevalence of limiting disability increased with age in men, but not women. Among women,  
20 prevalence was lower in those of Black/Black British ethnicity than those of other ethnicities  
21 and higher among those not in a steady relationship. Although the numbers of participants  
22 not identifying as heterosexual was small, prevalence of limiting disability was higher among  
23 them, including after adjusting for age, relative to participants identifying as  
24 heterosexual/straight. There was also an association with socioeconomic status for both  
25 genders, with those reporting currently having no job (AOR 3.43 for men and 2.25 for  
26 women) or being a student more likely to report limiting disability. Men and women with no  
27 academic qualifications were also more likely to report having limiting disability. We found  
28 no variation by deprivation area of residence as measured by the Index of Multiple  
29 Deprivation (21).  
30  
31  
32  
33  
34  
35  
36  
37  
38  
39

40 ***Association between limiting disability and sexual behaviour (Table 2)***  
41

42  
43 Both women and men with limiting disability were less likely than those without disability to  
44 report having had at least one sexual partner in the past year after adjustment for age and  
45 education (AOR 0.69 and 0.6 respectively), however there were no such differences in terms  
46 of the number of sexual partners in the past year with whom no condom was used. Those  
47 with limiting disability were more likely to report fewer occasions of sex in the past 4 weeks  
48 (AOR women 1.24, AOR men 1.38, for 0-2 occasions versus more than 2 occasions).  
49 Reporting having vaginal sex in the past month was less common among women with  
50 limiting disability than those without (AOR 0.78), but no difference was seen in men. No  
51 differences by disability status were found in reporting oral or anal sex or other genital  
52  
53  
54  
55  
56  
57  
58  
59  
60

1  
2  
3 contact without intercourse in the past month. Compared to women with no disability,  
4 women with limiting disability were more likely to report having same-sex partner(s) in the  
5 last five years (AOR 2.2), but this was not observed in men. Both women and men reporting  
6 limiting disability were more likely to have met their most recent partner via the internet  
7 than those with no disability (9.5% vs. 4.7% for women and 10.9% vs. 5.4% for men).  
8 Women with limiting disability reported a shorter time between meeting and first sex with  
9 their most recent partner than women with no disability, and were more likely to report  
10 having just, or recently, met their most recent partner when they first had sex together  
11 (AOR 1.54 for under 24 hours). These patterns were not observed in men.  
12  
13  
14  
15  
16  
17  
18  
19

### 20 ***Circumstances of sexual debut by disability status (Table 3)***

21  
22 We found differences by disability status in the circumstances of sexual debut among  
23 women, but not men. Women with limiting disability were more likely to report earlier  
24 sexual debut (aged under 16 at first heterosexual intercourse versus aged 16 or older, AOR  
25 1.49), and to report that they had to be persuaded or were forced (AOR 1.89) at first sex.  
26 Women with limiting disability were also more likely to be categorised as lacking 'sexual  
27 competence'<sup>1</sup> at first heterosexual intercourse (AOR 1.27 relative to those reporting no  
28 disability).  
29  
30  
31  
32  
33  
34  
35  
36

### 37 ***Variations in the reporting of sexual health outcomes by disability status (Table 4)***

38  
39 Women with limiting disability were more likely to report having ever experienced non-  
40 volitional sex than women without disability (AOR 3.19), with a higher AOR also for  
41 attempted non-volitional sex (AOR 2.59). Women with limiting disability were also more  
42 likely to disclose ever being diagnosed with an STI (AOR 1.43), having ever attended a sexual  
43 health clinic and to report having had an abortion. None of these associations were  
44 observed among men. Both women and men with limiting disability were more likely than  
45 those without disability to disclose that they were distressed or worried about their sex lives  
46  
47  
48  
49  
50  
51

---

52 <sup>1</sup> On the assumption that first intercourse should, ideally, be characterised by absence of  
53 duress and regret, autonomy of decision, and use of a reliable method of contraception,  
54 four variables relating to circumstances: regret, willingness, autonomy, and contraception at  
55 first intercourse, were used as criteria in the construction of a measure of sexual  
56 competence (39).  
57  
58  
59  
60

1  
2  
3 (AORs 1.52 and 1.69 respectively). One-third of women with limiting disability reported  
4 having sought help or advice for their sex life in the past year, and were more likely to have  
5 one so than women with no disability (AOR 1.65). This association was not observed among  
6  
7  
8 men.  
9

## 10 11 12 13 **Discussion**

14  
15  
16 This paper presents the results of the analysis of a large scale, nationally representative  
17 survey, in which we explored whether sexual behaviour and sexual health outcomes differ  
18 between people with limiting disability and those with no disability. It is one of few  
19 quantitative studies to do so, and the only one we know of to date in Britain. Disability that  
20 limited activities affected around one in ten people in this relatively young age group (17-34  
21 years). Around three-quarters of respondents with a limiting disability reported having one  
22 or more physical and/or mental health conditions. The main finding from these analyses is  
23 that, while young adults with disabilities in Britain report broadly similar sexual behaviour to  
24 young adults without disabilities, they are more likely to experience adverse sexual health  
25 outcomes. This is especially so for women. Of note, women with limiting disability were  
26 significantly more likely to have experienced sex against their will, STI diagnosis/es, an  
27 earlier sexual debut, and lack 'sexual competence' at first sex, including less frequent use of  
28 reliable contraception. While we did not find these associations for men, both women and  
29 men with limiting disability were more likely to report greater distress and less satisfaction  
30 with their sex lives than their peers.  
31  
32  
33  
34  
35  
36  
37  
38  
39  
40  
41  
42  
43

44  
45 There are relatively few comparable studies available, and none reporting on a British  
46 population. In the US, the Minnesota Adolescent Health study found few differences in  
47 sexual behaviours among young people with and without chronic physical conditions but,  
48 like our study, found poorer outcomes among those with chronic conditions including a  
49 higher proportion who had a history of sexual abuse and STI diagnosis (22). The US National  
50 Longitudinal Study of Adolescent Health found that physically disabled young people were  
51 as likely to be sexually active as their peers, but that young women with physical disabilities  
52 were more vulnerable to non-consensual sex (23). Our findings support existing evidence  
53  
54  
55  
56  
57  
58  
59  
60

1  
2  
3 that women with disabilities are a group at higher risk of experiencing non-volitional sex  
4 (13), sexual assault (24–26) and intimate partner violence (25–27).  
5  
6

7  
8 Our finding that people with limiting disability experience more distress and less satisfaction  
9 with their sex lives may partly reflect the large proportion of people with limiting disability  
10 reporting depression, since depression and/or the use of anti-depressants and difficulties  
11 with sexual function are known to interact (28). Studies have also shown that people with  
12 severe physical illnesses may experience sexual difficulties as a direct result of their  
13 condition (11). Other studies, including qualitative research, have reported higher levels of  
14 dissatisfaction or distress about sex life among people with disabilities which suggests that  
15 people with physical disability have the same sexual needs and desires as people without  
16 disability, but that their body image, sexual self-esteem, sexual satisfaction and life  
17 satisfaction may be lower (4,29).  
18  
19  
20  
21  
22  
23  
24  
25  
26

27  
28 In women with limiting disability, we also observed a shorter time between meeting and  
29 first sex with their most recent partner than in women with no disability. Previous research  
30 on stereotypes associated with disability and sexuality suggests that a woman who feels  
31 sexually disenfranchised or who has lower sexual esteem as a result of her disability may be  
32 more likely to have sex with a partner with whom she is less emotionally invested (30–32).  
33 However, having sex with someone soon after meeting may not, in itself, be a negative  
34 outcome if the experience is mutually-desired, safe, pleasurable, free of coercion,  
35 discrimination and violence (3). Nonetheless, this may not always be the case given the  
36 higher prevalence of adverse sexual health outcomes for young adults with limiting  
37 disability observed in the Natsal-3.  
38  
39  
40  
41  
42  
43  
44  
45

46  
47 There are limitations that need to be taken into consideration when interpreting the results  
48 from our study. Natsal-3 achieved a response rate of 57.7% overall in line with other major  
49 social surveys completed in Britain around the same time (33,34), although the response  
50 rate was higher among young people, this paper's study population. Non-response  
51 weighting was used such that the data broadly reflect the distribution of key demographic  
52 variables according to census data, however, selection bias is a potential issue. In this  
53 respect, it is important to acknowledge that Natsal-3's sampling frame meant that only  
54  
55  
56  
57  
58  
59  
60

1  
2  
3 people resident in private households in Britain were sampled, excluding people living in  
4 institutions who may be more likely to have limiting disabilities. A strength of Natsal-3 is  
5 that it used CAPI and specifically CASI to minimise reporting bias for the more sensitive  
6 questions. Nonetheless the data are self-reported, which are subject to recall and social  
7 desirability bias. Further, as a cross-sectional survey, chronology cannot always be  
8 determined and nor can causality in the associations we show be inferred. We have no  
9 information about the duration of disability, and whether or not, for example, a  
10 participant's disability preceded their first heterosexual intercourse.  
11  
12  
13  
14  
15  
16

17  
18  
19 The study included people who considered themselves to have a limiting disability rather  
20 than focussing specifically on people with particular impairment types e.g. sensory  
21 impairment, as is the case in most previous studies (8,11,35). However, there is a lack of  
22 information on the nature and severity of the impairment underlying the disability, which  
23 could help us further elucidate the relationship between disability and sexual health. In an  
24 attempt to provide context, we presented data on a number of health conditions and  
25 considered how this varied according to whether or not participants perceived themselves  
26 to have a limiting disability. Both mental and physical health conditions were more  
27 commonly reported by people with limiting disability than those without, supporting our  
28 use of this measure of disability. However it was not possible to determine whether a  
29 participant's limiting disability was as a result, even in part, of the conditions reported, or  
30 whether these conditions were experienced in addition to their limiting disability.  
31  
32  
33  
34  
35  
36  
37  
38  
39  
40  
41

42 Our findings have important implications for policy and practice. Firstly, limiting disability  
43 was common in this relatively young age group and, for the most part, sexual behaviour of  
44 people with disabilities was similar to that among those without disability. This points to the  
45 need for young people with limiting disabilities to be represented and included in sexual  
46 health promotion alongside their contemporaries. Secondly, that some negative outcomes  
47 are more commonly reported by this group, suggests that targeted efforts are also needed,  
48 which may need to be newly developed as they are currently lacking. Of note, non-volitional  
49 sex, which may need targeted policy and programme interventions. Sexual assault is  
50 frequently unreported to the police or authorities and research has shown that reporting is  
51 even less likely among people with a disability (36). When a report is made, support  
52  
53  
54  
55  
56  
57  
58  
59  
60

1  
2  
3 following sexual assault neither targets the circumstances of, nor meets the needs of,  
4 people with disability (36–38). Interventions for distress about sex lives may also require  
5 targeted policy and programme interventions. These should include awareness raising  
6 and/or educational interventions for health professionals, as evidence suggests a reluctance  
7 or failure to discuss sex with individuals with disabilities as it is not seen as pertinent (8).  
8 There are also implications for further research, including the need for qualitative research  
9 to understand the relationship between experiencing disability, distress, and satisfaction  
10 about sex.  
11  
12  
13  
14  
15  
16  
17  
18  
19

### 20 **Competing interest statement**

21 All authors have completed the ICMJE uniform disclosure form  
22 at [www.icmje.org/coi\\_disclosure.pdf](http://www.icmje.org/coi_disclosure.pdf) and declare: no support from any organisation for the  
23 submitted work; no financial relationships with any organisations that might have an  
24 interest in the submitted work in the previous three years; no other relationships or  
25 activities that could appear to have influenced the submitted work.  
26  
27  
28  
29  
30  
31

### 32 **Contributors**

33  
34 EH conceived the study. EH, CM, CT, HK, JD, and WM contributed to the design of the study.  
35 VT and CT conducted analysis of the data, and all authors contributed to the interpretation  
36 of the data. EH drafted the article, and it was critically revised for important intellectual  
37 content by EH, CM, CT, HK, JD, and WM. All authors contributed to the final approval of the  
38 version to be published. All authors had full access to all the data (including statistical  
39 reports and tables) in the study and can take responsibility for the integrity of the data and  
40 the accuracy of the data analysis.  
41  
42  
43  
44  
45  
46  
47

### 48 **Data sharing statement**

49 The Natsal-3 dataset has been archived at the UK Data Archive at the University of Essex and  
50 is accessible by academic researchers.  
51  
52  
53  
54  
55  
56  
57  
58  
59  
60



## References

1. WHO. World report on disability [Internet]. WHO; 2011. Available from: [http://www.who.int/disabilities/world\\_report/2011/en/](http://www.who.int/disabilities/world_report/2011/en/)
2. Pensions D for W and. Disability prevalence estimates 2002/03 to 2011/12 (Apr to Mar) [Internet]. 2014. Available from: <https://www.gov.uk/government/statistics/disability-prevalence-estimates-200203-to-201112-apr-to-mar>
3. WHO. Defining sexual health: report of a technical consultation on sexual health, 28–31 January 2002, Geneva [Internet]. 2006. Available from: [http://www.who.int/reproductivehealth/publications/sexual\\_health/defining\\_sexual\\_health.pdf](http://www.who.int/reproductivehealth/publications/sexual_health/defining_sexual_health.pdf)
4. Moin V, Duvdevany I, Mazor D. Sexual Identity, Body Image and Life Satisfaction Among Women With and Without Physical Disability. *Sex Disabil* [Internet]. 2009;27(2):83–95. Available from: <http://dx.doi.org/10.1007/s11195-009-9112-5>
5. Shakespeare T. Disabled Sexuality: Toward Rights and Recognition. *Sex Disabil* [Internet]. 2000;18(3):159–66. Available from: <http://dx.doi.org/10.1023/A:1026409613684>
6. Liddiard K. The work of disabled identities in intimate relationships. *Disabil Soc* [Internet]. 2014;29(1):115–28. Available from: <http://dx.doi.org/10.1080/09687599.2013.776486>
7. Anderson P, Kitchin R. Disability, space and sexuality: access to family planning services1. *Soc Sci Med* [Internet]. 2000;51(8):1163–73. Available from: <http://www.sciencedirect.com/science/article/pii/S0277953600000198>
8. Young R, Gore N, McCarthy M. Staff attitudes towards sexuality in relation to gender of people with intellectual disability: A qualitative study. *J Intellect Dev Disabil* [Internet]. 2012;37(4):343–7. Available from: <http://www.tandfonline.com/doi/abs/10.3109/13668250.2012.704983>

- 1  
2  
3 9. Diamond M. Sexuality and the handicapped. In: Orto PM and AD, editor. The  
4 Psychological and Social Impact of Physical Disability. New York: Springer Publishing;  
5 1984.  
6  
7
- 8  
9 10. Sexuality and Reproductive Health in Adults with Spinal Cord Injury: A Clinical Practice  
10 Guideline for Health-Care Professionals. J Spinal Cord Med [Internet].  
11 2010;33(3):281–336. Available from:  
12 <http://www.ncbi.nlm.nih.gov/pmc/articles/PMC2941243/>  
13  
14
- 15 11. Lew-Starowicz M, Rola R. Prevalence of Sexual Dysfunctions Among Women with  
16 Multiple Sclerosis. Sex Disabil [Internet]. 2013;31(2):141–53. Available from:  
17 <http://www.ncbi.nlm.nih.gov/pmc/articles/PMC3659270/>  
18  
19
- 20 12. Verschuren JEA, Zhdanova MA, Geertzen JHB, Enzlin P, Dijkstra PU, Dekker R. Let's  
21 talk about sex: lower limb amputation, sexual functioning and sexual well-being: a  
22 qualitative study of the partner's perspective. J Clin Nurs [Internet]. 2013;22(23–  
23 24):3557–67. Available from: <http://dx.doi.org/10.1111/jocn.12433>  
24  
25  
26  
27  
28  
29
- 30 13. Macdowall W, Gibson LJ, Tanton C, Mercer CH, Lewis R, Clifton S, et al. Lifetime  
31 prevalence, associated factors, and circumstances of non-volitional sex in women and  
32 men in Britain: findings from the third National Survey of Sexual Attitudes and  
33 Lifestyles (Natsal-3). Lancet [Internet]. 382(9907):1845–55. Available from:  
34 [http://dx.doi.org/10.1016/S0140-6736\(13\)62300-4](http://dx.doi.org/10.1016/S0140-6736(13)62300-4)  
35  
36  
37  
38  
39
- 40 14. Field N, Mercer CH, Sonnenberg P, Tanton C, Clifton S, Mitchell KR, et al. Associations  
41 between health and sexual lifestyles in Britain: findings from the third National  
42 Survey of Sexual Attitudes and Lifestyles (Natsal-3). Lancet [Internet].  
43 382(9907):1830–44. Available from: [http://dx.doi.org/10.1016/S0140-  
44 6736\(13\)62222-9](http://dx.doi.org/10.1016/S0140-6736(13)62222-9)  
45  
46  
47  
48
- 49 15. Sonnenberg P, Clifton S, Beddows S, Field N, Soldan K, Tanton C, et al. Prevalence, risk  
50 factors, and uptake of interventions for sexually transmitted infections in Britain:  
51 findings from the National Surveys of Sexual Attitudes and Lifestyles (Natsal). Lancet  
52 [Internet]. 2017 Aug 1;382(9907):1795–806. Available from:  
53 [http://dx.doi.org/10.1016/S0140-6736\(13\)61947-9](http://dx.doi.org/10.1016/S0140-6736(13)61947-9)  
54  
55  
56  
57  
58  
59  
60

- 1  
2  
3 16. Wellings K, Jones KG, Mercer CH, Tanton C, Clifton S, Datta J, et al. The prevalence of  
4 unplanned pregnancy and associated factors in Britain: findings from the third  
5 National Survey of Sexual Attitudes and Lifestyles (Natsal-3). *Lancet* [Internet]. 2013  
6 Nov 30;382(9907):1807–16. Available from:  
7  
8 <http://www.ncbi.nlm.nih.gov/pmc/articles/PMC3898922/>  
9  
10  
11  
12 17. Health D of. Abortion Statistics, England and Wales: 2015. Summary information from  
13 the abortion notification forms returned to the Chief Medical Officers of England and  
14 Wales [Internet]. 2016. Available from:  
15 [https://www.gov.uk/government/uploads/system/uploads/attachment\\_data/file/57](https://www.gov.uk/government/uploads/system/uploads/attachment_data/file/570040/Updated_Abortion_Statistics_2015.pdf)  
16 [0040/Updated\\_Abortion\\_Statistics\\_2015.pdf](https://www.gov.uk/government/uploads/system/uploads/attachment_data/file/570040/Updated_Abortion_Statistics_2015.pdf)  
17  
18  
19  
20  
21  
22 18. Erens B, Phelps A, Clifton S, Mercer CH, Tanton C, Hussey D, et al. Methodology of the  
23 third British National Survey of Sexual Attitudes and Lifestyles (Natsal-3). *Sex Transm*  
24 *Infect* [Internet]. 2013; Available from:  
25 <http://sti.bmj.com/content/early/2013/11/22/sextrans-2013-051359.abstract>  
26  
27  
28  
29  
30 19. WHO. Towards a Common Language for Functioning, Disability and Health [Internet].  
31 Geneva; 2002. Available from:  
32 <http://www.who.int/classifications/icf/icfbeginnersguide.pdf>  
33  
34  
35  
36 20. Erens B, Phelps A, Clifton S, Hussey D, Mercer CH, Tanton C, et al. National Survey of  
37 Sexual Attitudes and Lifestyles 3. Technical Report. Volume 1: Methodology  
38 [Internet]. Available from: [http://www.natsal.ac.uk/media/2090/natsal-3-technical-](http://www.natsal.ac.uk/media/2090/natsal-3-technical-report.pdf)  
39 [report.pdf](http://www.natsal.ac.uk/media/2090/natsal-3-technical-report.pdf)  
40  
41  
42  
43 21. Rupert Payne; Gary Abel. UK indices of multiple deprivation—a way to make  
44 comparisons across constituent countries easier. *Heal Stat Q*. 2012;53:22–37.  
45  
46  
47  
48 22. Surís J-C, Resnick MD, Cassuto N, Blum RWM. Sexual behavior of adolescents with  
49 chronic disease and disability. *J Adolesc Heal* [Internet]. 1996;19(2):124–31. Available  
50 from: <http://www.sciencedirect.com/science/article/pii/1054139X9500282W>  
51  
52  
53  
54 23. Cheng MM, Udry JR. Sexual behaviors of physically disabled adolescents in the United  
55 States. *J Adolesc Heal* [Internet]. 2002;31(1):48–58. Available from:  
56  
57  
58  
59  
60

- 1  
2  
3 <http://www.sciencedirect.com/science/article/pii/S1054139X01004001>  
4  
5  
6 24. Martin SL, Ray N, Sotres-Alvarez D, Kupper LL, Moracco KE, Dickens PA, et al. Physical  
7 and sexual assault of women with disabilities. *Violence Against Women* [Internet].  
8 2006;12(9):823–37. Available from:  
9 [https://www.scopus.com/inward/record.uri?eid=2-s2.0-](https://www.scopus.com/inward/record.uri?eid=2-s2.0-33747081336&doi=10.1177%2F1077801206292672&partnerID=40&md5=192e199ab184dad433e65982850e441f)  
10 [33747081336&doi=10.1177%2F1077801206292672&partnerID=40&md5=192e199ab](https://www.scopus.com/inward/record.uri?eid=2-s2.0-33747081336&doi=10.1177%2F1077801206292672&partnerID=40&md5=192e199ab184dad433e65982850e441f)  
11 [184dad433e65982850e441f](https://www.scopus.com/inward/record.uri?eid=2-s2.0-33747081336&doi=10.1177%2F1077801206292672&partnerID=40&md5=192e199ab184dad433e65982850e441f)  
12  
13  
14  
15  
16  
17 25. Lin L-P, Yen C-F, Kuo F-Y, Wu J-L, Lin J-D. Sexual assault of people with disabilities:  
18 Results of a 2002–2007 national report in Taiwan. *Res Dev Disabil* [Internet].  
19 2009;30(5):969–75. Available from:  
20 <http://www.sciencedirect.com/science/article/pii/S0891422209000262>  
21  
22  
23  
24  
25 26. M. Schröttle SG. Intimate Partner Violence Against Disabled Women as a Part of  
26 Widespread Victimization and Discrimination over the Lifetime: Evidence from a  
27 German Representative Study. *Int J Conf Violence*. 2013;7(2):232–48.  
28  
29  
30  
31 27. Barrett KA, O’Day B, Roche A, Carlson BL. Intimate Partner Violence, Health Status,  
32 and Health Care Access Among Women with Disabilities. *Women’s Heal Issues*  
33 [Internet]. 2009;19(2):94–100. Available from:  
34 <http://www.sciencedirect.com/science/article/pii/S1049386708001783>  
35  
36  
37  
38  
39 28. Clayton AH, El Haddad S, Iluonakhamhe J-P, Ponce Martinez C, Schuck AE. Sexual  
40 dysfunction associated with major depressive disorder and antidepressant treatment.  
41 *Expert Opin Drug Saf* [Internet]. 2014;13(10):1361–74. Available from:  
42 <http://dx.doi.org/10.1517/14740338.2014.951324>  
43  
44  
45  
46  
47 29. Smith AE, Molton IR, McMullen K, Jensen MP. Sexual Function, Satisfaction, and Use  
48 of Aids for Sexual Activity in Middle-Aged Adults with Long-Term Physical Disability.  
49 *Top Spinal Cord Inj Rehabil* [Internet]. 2015;21(3):227–32. Available from:  
50 <http://www.ncbi.nlm.nih.gov/pmc/articles/PMC4568085/>  
51  
52  
53  
54  
55 30. McCabe MP, Taleporos G. Sexual esteem, sexual satisfaction, and sexual behavior  
56 among people with physical disability. *Arch Sex Behav*. 2003 Aug;32(4):359–69.  
57  
58  
59  
60

- 1  
2  
3 31. Milligan MS, Neufeldt AH. The Myth of Asexuality: A Survey of Social and Empirical  
4 Evidence. *Sex Disabil* [Internet]. 2001;19(2):91–109. Available from:  
5  
6 <https://doi.org/10.1023/A:1010621705591>  
7  
8  
9 32. Taleporos G, McCabe MP. Relationships, sexuality and adjustment among people with  
10 physical disability. *Sex Relatsh Ther* [Internet]. 2003 Feb 1;18(1):25–43. Available  
11 from: <http://dx.doi.org/10.1080/1468199031000061245>  
12  
13  
14 33. Craig R, Mindell J, Eds. *Health Survey for England 2010—volume 1: respiratory health*.  
15 Leeds; 2011.  
16  
17  
18 34. Park A, Clery E, Curtice J, Phillips M, Utting D. *British social attitudes: the 28th report*.  
19 London; 2012.  
20  
21  
22  
23 35. Hughes K, Bellis MA, Jones L, Wood S, Bates G, Eckley L, et al. Prevalence and risk of  
24 violence against adults with disabilities: a systematic review and meta-analysis of  
25 observational studies. *Lancet* [Internet]. 379(9826):1621–9. Available from:  
26  
27 [http://dx.doi.org/10.1016/S0140-6736\(11\)61851-5](http://dx.doi.org/10.1016/S0140-6736(11)61851-5)  
28  
29  
30 36. Anderson ML, Leigh IW. Intimate Partner Violence Against Deaf Female College  
31 Students. *Violence Against Women* [Internet]. 2011 Jun 15;17(7):822–34. Available  
32 from: <http://dx.doi.org/10.1177/1077801211412544>  
33  
34  
35 37. Nannini A. Sexual assault patterns among women with and without disabilities  
36 seeking survivor services. *Women’s Heal Issues* [Internet]. 2006;16(6):372–9.  
37 Available from:  
38  
39 <http://www.sciencedirect.com/science/article/pii/S1049386706001101>  
40  
41  
42 38. Obinna J, Krueger S, Sadusky J., DeVore W. Understanding the Needs of the Victims of  
43 Sexual Assault in the Deaf Community: A Needs Assessment and Audit [Internet].  
44 2005. Available from: <https://www.ncjrs.gov/pdffiles1/nij/grants/212867.pdf>  
45  
46  
47 39. Wellings K, Nanchahal K, Macdowall W, McManus S, Erens B, Mercer CH, et al. Sexual  
48 behaviour in Britain: early heterosexual experience. *Lancet* [Internet].  
49 2001;358(9296):1843–50. Available from:  
50  
51 <http://www.sciencedirect.com/science/article/pii/S0140673601068854>  
52  
53  
54  
55  
56  
57  
58  
59  
60

Table 1. Variation in the reporting of limiting disability by key sociodemographic characteristics among Natsal-3 participants aged 17-34, by gender

|                                          | WOMEN                             |                                          |                                                | MEN                               |                                          |                                                |
|------------------------------------------|-----------------------------------|------------------------------------------|------------------------------------------------|-----------------------------------|------------------------------------------|------------------------------------------------|
|                                          | Unweighted, weighted denominators | % (95% CI) reporting limiting disability | AOR* (95% CI) of reporting limiting disability | Unweighted, weighted denominators | % (95% CI) reporting limiting disability | AOR* (95% CI) of reporting limiting disability |
| <i>All</i>                               | 3953/2228                         | 11.0 (10.0-12.1)                         |                                                | 2786/2284                         | 8.2% (7.1-9.4)                           |                                                |
| <i>Age</i>                               |                                   |                                          | P=0.65                                         |                                   |                                          | P<0.01                                         |
| 17-19                                    | 694, 369                          | 10.4 (8.0-13.4)                          | Reference category                             | 598, 378                          | 5.1 (3.5-7.4)                            | Reference category                             |
| 20-24                                    | 1054, 632                         | 10.2 (8.4-12.4)                          | 0.98 (0.69-1.41)                               | 805, 648                          | 6.5 (4.8-8.8)                            | 1.30 (0.78-2.18)                               |
| 25-29                                    | 1264, 626                         | 11.2 (9.5-13.1)                          | 1.09 (0.77-1.53)                               | 806, 652                          | 9.4 (7.5-11.6)                           | 1.93 (1.22-3.05)                               |
| 30-34                                    | 941, 600                          | 12.0 (10.0-14.3)                         | 1.18 (0.82-1.68)                               | 577, 606                          | 10.5 (7.9-13.9)                          | 2.19 (1.32-3.64)                               |
| <i>Ethnicity</i>                         |                                   |                                          | P=0.002                                        |                                   |                                          | P=0.31                                         |
| White                                    | 3327, 1818                        | 11.6 (10.5-12.8)                         | Reference category                             | 2350, 1851                        | 8.7 (7.6-10.0)                           | Reference category                             |
| Mixed                                    | 130, 70                           | 16.1 (9.2-26.8)                          | 1.50 (0.76-2.96)                               | 81, 68                            | 7.9 (3.6-16.6)                           | 0.97 (0.42-2.24)                               |
| Asian/Asian British                      | 259, 184                          | 7.9 (5.2-11.8)                           | 0.77 (0.48-1.25)                               | 199, 224                          | 5.7 (2.0-15.1)                           | 0.75 (0.26-2.20)                               |
| Black/Black British                      | 156, 100                          | 3.8 (1.5-9.2)                            | 0.29 (0.10-0.84)                               | 99, 89                            | 5.3 (2.1-12.9)                           | 0.38 (0.14-1.02)                               |
| Chinese/other <sup>1</sup>               | 71, 50                            | 7.0 (2.0-21.5)                           | 0.32 (0.09-1.08)                               | 51, 48                            | 3.0 (0.6-13.0)                           | 0.49 (0.11-2.26)                               |
| <i>Relationship status</i>               |                                   |                                          | P=0.06                                         |                                   |                                          | P=0.31                                         |
| Living with a partner                    | 1738, 1083                        | 10.5 (9.1-12.1)                          | Reference category                             | 983, 956                          | 8.7 (6.8-10.9)                           | Reference category                             |
| In a steady relationship, not cohabiting | 915, 447                          | 10.3 (8.4-12.5)                          | 1.15 (0.85-1.55)                               | 616, 453                          | 7.7 (5.8-10.3)                           | 1.32 (0.83-2.09)                               |
| No steady relationship                   | 1253, 673                         | 12.5 (10.6-14.7)                         | 1.38 (1.05-1.81)                               | 1148, 848                         | 7.6 (6.2-9.4)                            | 1.36 (0.91-2.06)                               |

|                                                               |            |                  |                    |            |                  |                    |
|---------------------------------------------------------------|------------|------------------|--------------------|------------|------------------|--------------------|
| <i>Sexual identity</i> <sup>2</sup>                           |            |                  | P<0.0001           |            |                  | P=0.13             |
| Heterosexual/straight                                         | 3779, 2127 | 10.3 (9.4-11.4)  | Reference category | 2678, 2201 | 8.1 (7.0-9.3)    | Reference category |
| Gay/lesbian                                                   | 43, 24     | 18.7 (9.4-33.6)  | 2.11 (1.00-4.47)   | 61, 45     | 13.4 (7.0-23.9)  | 2.05 (1.00-4.21)   |
| Bisexual                                                      | 105, 59    | 28.5 (18.8-40.8) | 3.61 (2.05-6.37)   | 29, 22     | 8.9 (2.6-26.5)   | 1.41 (0.41-4.86)   |
|                                                               |            |                  |                    |            |                  |                    |
| <i>National Statistics Socio-Economic Classification</i>      |            |                  | P=0.003            |            |                  | P=0.002            |
| Manager/professional                                          | 940, 565   | 8.3 (6.6-10.4)   | Reference category | 698, 639   | 6.1 (4.1-9.1)    | Reference category |
| Intermediate                                                  | 705, 393   | 10.2 (8.1-12.8)  | 1.13 (0.77-1.64)   | 353, 299   | 11.6 (8.5-15.7)  | 1.73 (0.98-3.07)   |
| Semi-routine/routine                                          | 1221, 632  | 12.6 (10.8-14.8) | 1.33 (0.95-1.88)   | 983, 762   | 8.6 (6.9-10.6)   | 1.21 (0.73-2.03)   |
| No job currently                                              | 313, 173   | 19.5 (15.1-24.8) | 2.25 (1.45-3.50)   | 115, 83    | 19.0 (12.5-27.8) | 3.43 (1.62-7.27)   |
| Student                                                       | 750, 453   | 9.5 (7.3-12.3)   | 1.59 (1.02-2.46)   | 624, 487   | 6.1 (4.2-8.7)    | 2.08 (1.09-3.96)   |
|                                                               |            |                  |                    |            |                  |                    |
| <i>Academic qualifications</i> <sup>3</sup>                   |            |                  | P<0.0001           |            |                  | P<0.0001           |
| No academic qualifications                                    | 341, 167   | 19.9 (15.4-25.3) | Reference category | 218, 171   | 20.4 (15.7-26.2) | Reference category |
| Qualifications typically gained at age 16                     | 1203, 605  | 14.3 (12.3-16.6) | 0.68 (0.48-0.96)   | 853, 657   | 9.7 (7.8-11.9)   | 0.42 (0.28-0.63)   |
| Studying for or have attained further academic qualifications | 2253, 1355 | 8.7 (7.5-10.0)   | 0.39 (0.28-0.55)   | 1625, 1364 | 6.2 (4.8-7.9)    | 0.27 (0.18-0.41)   |
|                                                               |            |                  |                    |            |                  |                    |
| <i>Quintile of IMD</i>                                        |            |                  | P=0.42             |            |                  | P=0.67             |
| Least deprived (1,2)                                          | 1238, 702  | 11.0 (9.2-13.2)  | Reference category | 962, 756   | 7.0 (5.4-8.9)    | Reference category |
| 3                                                             | 785, 462   | 10.5 (8.5-12.9)  | 0.93 (0.68-1.27)   | 529, 431   | 7.7 (4.9-11.8)   | 1.06 (0.61-1.87)   |
| Most deprived (4,5)                                           | 1930, 1064 | 11.1 (9.7-12.7)  | 0.84 (0.65-1.09)   | 1295, 1097 | 9.2 (7.6-11.0)   | 1.16 (0.83-1.64)   |

\* Odds ratio adjusted for age and education.

<sup>1</sup> Chinese and other subcategories were merged because of small numbers in these categories.

<sup>2</sup> Excludes those reporting 'other' to the question about sexual identity as this was reported by too few participants to provide robust estimates.

<sup>3</sup> Applies only to respondents aged 17+ years.

Table 2 Variations in the reporting of key health and sexual behaviours among Natsal-3 participants aged 17-34 by limiting disability status and gender.

|                                                                   | WOMEN                                                     |                                                               |         | MEN                                                       |                                                               |         |
|-------------------------------------------------------------------|-----------------------------------------------------------|---------------------------------------------------------------|---------|-----------------------------------------------------------|---------------------------------------------------------------|---------|
|                                                                   | % (95% CI) of those reporting no disability (n=3495,1983) | % (95% CI) of those reporting limiting disability (n=458,245) | p-value | % (95% CI) of those reporting no disability (n=2539,2098) | % (95% CI) of those reporting limiting disability (n=247,186) | p-value |
| <i>Number of partners<sup>†</sup>, past year</i>                  |                                                           |                                                               |         |                                                           |                                                               |         |
| 0                                                                 | 11.8 (10.5-13.2)                                          | 14.6 (11.3-18.7)                                              |         | 12.7 (11.3-14.3)                                          | 14.4 (10.2-19.9)                                              |         |
| 1                                                                 | 68.4 (66.5-70.2)                                          | 63.0 (57.8-67.8)                                              |         | 59.5 (57.2-61.7)                                          | 60.0 (52.7-66.8)                                              |         |
| ≥ 2                                                               | 19.8 (18.4-21.4)                                          | 22.4 (18.2-27.2)                                              |         | 27.8 (25.9-29.8)                                          | 25.6 (20.1-32.0)                                              |         |
| AOR* † (0 vs. ≥ 1)                                                | 1                                                         | 0.69 (0.49-0.96)                                              | 0.03    | 1                                                         | 0.6 (0.39-0.94)                                               | 0.02    |
| <i>Number of partners<sup>†</sup> without a condom, past year</i> |                                                           |                                                               |         |                                                           |                                                               |         |
| 0                                                                 | 25.4 (23.7-27.2)                                          | 27.4 (22.9-32.5)                                              |         | 31.3 (29.1-33.5)                                          | 28.9 (22.9-35.7)                                              |         |
| 1                                                                 | 64.0 (62.1-65.9)                                          | 61.2 (56.1-66.0)                                              |         | 55.6 (53.2-57.9)                                          | 57.1 (49.7-64.2)                                              |         |
| ≥ 2                                                               | 10.6 (9.5-11.8)                                           | 11.4 (8.8-14.7)                                               |         | 13.2 (11.7-14.7)                                          | 14.0 (10.0-19.3)                                              |         |
| AOR* †                                                            | 1                                                         | 1.12 (0.81-1.55)                                              | 0.50    |                                                           | 1.11 (0.73-1.68)                                              | 0.64    |
| <i>Number of occasions of sex<sup>†</sup>, past 4 weeks</i>       |                                                           |                                                               |         |                                                           |                                                               |         |
| 0-2                                                               | 45.4 (43.4-47.5)                                          | 50.1 (44.8-55.4)                                              |         | 47.4 (45.2-49.7)                                          | 51.5 (43.8-59.1)                                              |         |
| 3-4                                                               | 17.2 (15.8-18.8)                                          | 19.0 (15.1-23.7)                                              |         | 17.1 (15.5-18.9)                                          | 12.9 (8.6-18.8)                                               |         |
| 5+                                                                | 37.3 (35.4-39.3)                                          | 30.8 (26.1-36.0)                                              |         | 35.4 (33.3-37.6)                                          | 35.6 (28.9-42.9)                                              |         |



|                                                                    |                  |                     |         |                  |                  |        |
|--------------------------------------------------------------------|------------------|---------------------|---------|------------------|------------------|--------|
| AOR* †                                                             | 1                | 1.24 (0.98-1.55)    | 0.07    | 1                | 1.38 (0.99-1.94) | 0.06   |
| <i>Vaginal sex, past month</i>                                     | 70.3 (68.6-72.0) | 65.4 (60.2-70.3)    |         | 66.5 (64.4-68.5) | 67.0 (60.4-73.0) |        |
| AOR* †                                                             | 1                | 0.78 (0.61-0.99)    | 0.04    | 1                | 0.79 (0.57-1.09) | 0.14   |
| <i>Given/received oral sex<sup>†</sup>, past month</i>             | 54.2 (52.3-56.2) | 50.61 (45.56-55.64) |         | 56.0 (53.8-58.2) | 55.4 (48.2-62.3) |        |
| AOR* †                                                             | 1                | 0.88 (0.71-1.09)    | 0.25    | 1                | 1.01 (0.75-1.37) | 0.92   |
| <i>Genital contact without intercourse<sup>†</sup>, last month</i> | 53.7 (51.8-55.6) | 50.9 (45.8-56.0)    |         | 53.8 (51.5-56.1) | 47.6 (40.4-55.0) |        |
| AOR* †                                                             | 1                | 0.91 (0.73-1.14)    | 0.41    | 1                | 0.82 (0.59-1.14) | 0.24   |
| <i>Same-sex partner(s), past 5 years</i>                           | 5.0 (4.2-5.8)    | 10.4 (7.5-14.2)     |         | 3.2 (2.5-4.0)    | 4.1 (2.4-7.0)    |        |
| AOR* †                                                             | 1                | 2.20 (1.49-3.26)    | <0.0001 | 1                | 1.5 (0.81-2.79)  | 0.20   |
| <i>Where first met most recent partner</i>                         |                  |                     |         |                  |                  |        |
| School/work                                                        | 36.0 (34.1-37.9) | 29.0 (24.4-34.0)    |         | 41.2 (38.9-43.5) | 28.0 (20.6-36.7) | 0.0003 |
| Online/internet dating                                             | 4.7 (4.0-5.6)    | 9.5 (6.9-13.0)      | 0.0007  | 5.4 (4.4-6.7)    | 10.9 (7.1-16.4)  |        |
| Always known each other/neighbour                                  | 7.0 (6.0-8.1)    | 8.1 (5.7-11.4)      |         | 4.9 (4.0-6.0)    | 6.0 (3.5-10.2)   |        |
| Public place                                                       | 20.3 (18.8-21.9) | 18.9 (15.1-23.4)    |         | 21.8 (20.0-23.7) | 18.2 (13.3-24.5) |        |
| Other                                                              | 32.0 (30.2-33.8) | 34.5 (29.6-39.8)    |         | 26.6 (24.6-28.8) | 36.9 (30.0-44.4) |        |
| <i>Time between first meeting</i>                                  |                  |                     |         |                  |                  |        |

|                                                                               |                  |                  |         |                  |                  |      |
|-------------------------------------------------------------------------------|------------------|------------------|---------|------------------|------------------|------|
| <i>most recent partner and first sex</i>                                      |                  |                  |         |                  |                  |      |
| <b>24 hours or less</b>                                                       | 5.2 (4.4-6.2)    | 9.9 (7.1-13.7)   |         | 9.2 (7.9-10.6)   | 11.4 (7.6-16.7)  |      |
| <b>Between 1 day and 1 week</b>                                               | 7.7 (6.7-8.9)    | 9.8 (7.1-13.4)   |         | 9.8 (8.5-11.2)   | 8.9 (5.6-13.8)   |      |
| Between 1 week and 6 months                                                   | 56.2 (54.2-58.2) | 50.9 (45.3-56.4) |         | 54.5 (52.1-56.9) | 49.9 (41.7-58.1) |      |
| Between 6 months and 5 years                                                  | 26.0 (24.3-27.7) | 23.3 (18.9-28.4) |         | 22.6 (20.6-24.8) | 23.9 (16.5-33.2) |      |
| 5 years or more                                                               | 4.9 (4.0-5.9)    | 6.0 (4.0-8.9)    |         | 3.9 (3.1-5.0)    | 6.0 (3.3-10.5)   |      |
| AOR* †                                                                        | 1                | 1.57 (1.02-2.42) | 0.04    | 1                | 1.17 (0.73-1.89) | 0.51 |
| <i>Condom not used on first occasion with most recent partner<sup>2</sup></i> |                  |                  |         |                  |                  |      |
|                                                                               | 35.4 (33.4-37.5) | 40.4 (35.0-46.0) |         | 38.2 (35.8-40.6) | 46.9 (38.0-56.1) |      |
| AOR* †                                                                        | 1                | 1.13 (0.89-1.44) | 0.31    | 1                | 1.20 (0.80-1.79) | 0.38 |
| <i>Relationship status at first sex with most recent partner</i>              |                  |                  |         |                  |                  |      |
| <b>Just met/had met recently</b>                                              | 20.8 (19.1-22.5) | 33.8 (28.8-39.2) |         | 29.4 (27.1-31.7) | 32.3 (25.1-40.5) |      |
| Know each other/used to be in a relationship                                  | 25.1 (23.3-26.9) | 21.8 (17.6-26.7) |         | 27.9 (25.7-30.1) | 25.2 (18.9-32.7) |      |
| Steady relationship/living together/married                                   | 54.2 (52.1-56.2) | 44.4 (38.9-50.0) |         | 42.8 (40.3-45.3) | 42.5 (33.6-51.9) |      |
| AOR* †                                                                        | 1                | 1.86 (1.43-2.42) | P<0.001 | 1                | 1.15 (0.79-1.67) | 0.48 |

\*Odds ratio adjusted for age and education

1  
2  
3  
4  
5  
6  
7  
8  
9  
10  
11  
12  
13  
14  
15  
16  
17  
18  
19  
20  
21  
22  
23  
24  
25  
26  
27  
28  
29  
30  
31  
32  
33  
34  
35  
36  
37  
38  
39  
40  
41  
42  
43  
44  
45  
46  
47  
48  
49

†Adjusted odds ratio for reporting the responses in bold font (for those variables with  $\geq 2$  response options) relative to 'no disability'

<sup>1</sup> Opposite-sex and/or same-sex partner

<sup>2</sup> Respondents who only had oral sex on the most recent occasion were excluded

For peer review only

Table 3: Variations in the reporting of circumstances relating to sexual debut among Natsal-3 participants aged 17-34 by limiting disability status and gender

|                                                                  | WOMEN                                                     |                                                               |         | MEN                                                           |                                                               |         |
|------------------------------------------------------------------|-----------------------------------------------------------|---------------------------------------------------------------|---------|---------------------------------------------------------------|---------------------------------------------------------------|---------|
|                                                                  | % (95% CI) of those reporting no disability (n=3495,1983) | % (95% CI) of those reporting limiting disability (n=458,245) | p-value | Men % (95% CI) of those reporting no disability (n=2539,2098) | % (95% CI) of those reporting limiting disability (n=247,186) | p-value |
| <i>Age at first heterosexual intercourse.</i>                    |                                                           |                                                               |         |                                                               |                                                               |         |
| 13-15                                                            | 27.8 (26.1-29.6)                                          | 39.6 (34.6-44.9)                                              |         | 29.8 (27.8-32.0)                                              | 36.4 (29.4-44.0)                                              |         |
| 16-17                                                            | 43.3 (41.3-45.3)                                          | 39.8 (34.7-45.0)                                              |         | 39.6 (37.3-41.9)                                              | 35.8 (28.7-43.6)                                              |         |
| 18-19                                                            | 16.4 (15.0-18.0)                                          | 12.3 (9.2-16.3)                                               |         | 20.0 (18.2-22.0)                                              | 19.6 (14.3-26.3)                                              |         |
| ≥ 20                                                             | 12.5 (10.9-14.1)                                          | 8.3 (5.8-11.7)                                                |         | 10.6 (9.1-12.2)                                               | 8.2 (3.2-19.3)                                                |         |
| AOR**†                                                           | 1                                                         | 1.49 (1.17-1.91)                                              | 0.001   | 1                                                             | 1.16 (0.83-1.62)                                              | 0.39    |
| <i>Willingness at first heterosexual intercourse<sup>1</sup></i> |                                                           |                                                               |         |                                                               |                                                               |         |
| Both willing                                                     | 82.8 (81.2-84.3)                                          | 76.0 (71.1-80.4)                                              |         | 91.1 (89.6-92.3)                                              | 88.9 (83.5-92.7)                                              |         |
| Respondent more willing                                          | 1.3 (0.9-1.8)                                             | 2.4 (1.1-5.1)                                                 |         | 3.5 (2.6-4.6)                                                 | 2.1 (0.9-5.0)                                                 |         |
| Partner more willing, respondent also willing                    | 6.7 (5.7-7.9)                                             | 4.5 (2.8-7.4)                                                 |         | 3.4 (2.7-4.3)                                                 | 7.1 (4.1-12.1)                                                |         |
| Respondent had to be persuaded                                   | 8.1 (7.1-9.3)                                             | 13.3 (10.0-17.5)                                              |         | 1.9 (1.4-2.7)                                                 | 1.9 (0.7-5.2)                                                 |         |

|                                                                             |                  |                  |         |  |                  |                  |      |
|-----------------------------------------------------------------------------|------------------|------------------|---------|--|------------------|------------------|------|
| Respondent was forced                                                       | 1.1 (0.8-1.6)    | 3.7 (2.1-6.3)    |         |  | 0.1 (0.0-0.4)    | 0                |      |
| AOR**†                                                                      | 1                | 1.89 (1.38-2.59) | <0.0001 |  | -                | -                |      |
| <i>Lack of sexual competence at first heterosexual intercourse</i>          | 48.8 (46.9-50.7) | 57.8 (52.6-62.8) |         |  | 44.8 (42.4-47.3) | 47.4 (39.5-55.4) |      |
| AOR**†                                                                      | 1                | 1.27 (1.01-1.61) | 0.04    |  | 1                | 0.92 (0.66-1.29) | 0.64 |
| <i>Lack of autonomy at first heterosexual intercourse</i> <sup>2</sup>      | 39.1 (37.1-41.1) | 36.4 (31.3-41.8) |         |  | 47.6 (45.3-50.0) | 43.4 (35.7-51.5) |      |
| AOR**†                                                                      | 1                | 0.84 (0.66-1.08) | 0.17    |  | 1                | 0.82 (0.58-1.16) | 0.26 |
| <i>Opinion now of timing of first heterosexual intercourse</i> <sup>3</sup> |                  |                  |         |  |                  |                  |      |
| <b>Should have waited longer</b>                                            | 32.3 (30.5-34.2) | 38.2 (33.3-43.4) |         |  | 16.6 (15.0-18.4) | 22.4 (17.0-28.9) |      |
| Should not have waited so long                                              | 3.1 (2.4-3.9)    | 4.9 (2.9-8.1)    |         |  | 7.0 (5.9-8.3)    | 5.1 (2.7-9.3)    |      |
| About the right time                                                        | 64.6 (62.8-66.4) | 56.9 (51.6-62.0) |         |  | 76.3 (74.3-78.3) | 72.5 (65.5-78.6) |      |
| AOR**†                                                                      | 1                | 1.21 (0.96-1.52) | 0.11    |  | 1                | 1.37 (0.95-2.00) | 0.09 |
| <i>Reliable contraception not used at first sex</i> <sup>3</sup>            | 14.0 (12.7-15.4) | 18.7 (14.9-23.3) |         |  | 17.8 (15.9-19.7) | 24.4 (18.5-31.5) |      |
| AOR**†                                                                      | 1                | 1.33 (0.98-1.79) | 0.07    |  | 1                | 1.14 (0.78-1.66) | 0.51 |

1  
2  
3  
4  
5 \*Odds ratio adjusted for age and education

6 † Adjusted odds ratio for reporting the responses in bold font (for those variables with  $\geq 2$  response options) relative to 'no disability'

7 <sup>1</sup> Not sufficient numbers to report odds ratio for men

8 <sup>2</sup> Reasons for first intercourse: peers doing it; bit drunk; smoked some cannabis; taken some other drugs.

9 <sup>3</sup> Applies to respondents not forced

10  
11  
12  
13  
14  
15  
16  
17  
18  
19  
20  
21  
22  
23  
24  
25  
26  
27  
28  
29  
30  
31  
32  
33  
34  
35  
36  
37  
38  
39  
40  
41  
42  
43  
44  
45  
46  
47  
48  
49

For peer review only

Table 4: Variations in the reporting of key sexual health outcomes among Natsal-3 participants aged 17-34 by limiting disability status and gender

| Sexual health outcome                                   | WOMEN                                                     |                                                               |                                                                     |         | MEN                                                       |                                                              |                                                                     |         |
|---------------------------------------------------------|-----------------------------------------------------------|---------------------------------------------------------------|---------------------------------------------------------------------|---------|-----------------------------------------------------------|--------------------------------------------------------------|---------------------------------------------------------------------|---------|
|                                                         | % (95% CI) of those reporting no disability (n=3495,1983) | % (95% CI) of those reporting limiting disability (n=458,245) | AOR* (95% CI) for reporting outcome if reported limiting disability | p-value | % (95% CI) of those reporting no disability (n=2539,2098) | % (95% CI) of those reporting limiting disability (n=247186) | AOR* (95% CI) for reporting outcome if reported limiting disability | p-value |
| Experienced non-volitional sex                          | 6.9% (6.0-8.0)                                            | 19.5% (15.7-24.0)                                             | 3.19 (2.36-4.30)                                                    | <0.0001 | 1.3% (0.9-1.9)                                            | 2.1% (0.9-4.6)                                               | 1.5 (0.60-3.74)                                                     | 0.38    |
| Experienced attempted non-volitional sex                | 16.0% (14.7-17.4)                                         | 33.0% (28.3-38.1)                                             | 2.59 (2.02-3.31)                                                    | <0.0001 | 4.2% (3.4-5.2)                                            | 5.7% (3.3-9.7)                                               | 1.41 (0.76-2.64)                                                    | 0.28    |
| Ever diagnosed with a STI <sup>1</sup>                  | 37.8% (35.9-39.6)                                         | 47.2% (42.1-52.4)                                             | 1.43 (1.14-1.79)                                                    | 0.002   | 13.0% (11.5-14.6)                                         | 12.4% (8.6-17.4)                                             | 0.82 (0.53-1.27)                                                    | 0.38    |
| Ever attended a sexual health (GUM) clinic <sup>2</sup> | 42.1% (40.1-44.1)                                         | 46.3% (41.2-51.6)                                             | 1.2 (0.96-1.51)                                                     | 0.11    | 35.0% (32.8-37.2)                                         | 35.7% (28.9-43.0)                                            | 1.03 (0.74-1.44)                                                    | 0.84    |
| Ever had a pregnancy that ended in an abortion          | 12.2% (11.0-13.4)                                         | 15.3% (12.0-19.1)                                             | 1.19 (0.88-1.60)                                                    | 0.25    |                                                           |                                                              |                                                                     |         |
| Distressed/worried about sex life                       | 10.9% (9.7-12.1)                                          | 16.7% (13.1-21.2)                                             | 1.52 (1.11-2.09)                                                    | 0.009   | 9.7% (8.5-11.0)                                           | 14.6% (10.3-20.2)                                            | 1.69 (1.09-2.63)                                                    | 0.02    |
| Sought help/advice for sex life, past year              | 25.2% (23.6-26.9)                                         | 33.8% (28.9-39.1)                                             | 1.65 (1.28-2.13)                                                    | 0.0001  | 19.6% (17.9-21.4)                                         | 18.5% (13.7-24.7)                                            | 1.15 (0.78-1.70)                                                    | 0.49    |

Supplementary table: Health conditions reported by people with limiting disability compared to no disability among Natsal-3 participants aged 17-34, stratified by gender

|                                                        | WOMEN                                         |                                                     |                                                                       |          | MEN                                           |                                                     |                                                                                |          |
|--------------------------------------------------------|-----------------------------------------------|-----------------------------------------------------|-----------------------------------------------------------------------|----------|-----------------------------------------------|-----------------------------------------------------|--------------------------------------------------------------------------------|----------|
| <i>Denominators</i>                                    | 3495, 1983                                    | 458, 245                                            |                                                                       |          | 2539, 2098                                    | 247, 186                                            |                                                                                |          |
|                                                        | % (95% C.I.) of those reporting no disability | % (95% C.I.) of those reporting limiting disability | AOR* (95% C.I.) for reporting outcome if reported limiting disability | p-value  | % (95% C.I.) of those reporting no disability | % (95% C.I.) of those reporting limiting disability | AOR* (95% C.I.) for reporting outcome if reported limiting disability 95% C.I. | p-value  |
| <i>≥ 1 mental health condition</i>                     |                                               |                                                     |                                                                       |          |                                               |                                                     |                                                                                |          |
| Yes                                                    | 16.1 (14.8-17.5)                              | 49.8 (44.7-54.9)                                    | 5.19 (4.14-6.50)                                                      | p<0.0001 | 11.5 (10.2-13.0)                              | 44.6 (37.1-52.4)                                    | 6.26 (4.44-8.82)                                                               | p<0.0001 |
| No                                                     | 83.9 (82.5-85.22)                             | 50.2 (45.11-55.3)                                   |                                                                       |          | 88.5 (86.98-89.83)                            | 55.4 (47.66-62.89)                                  |                                                                                |          |
| Treated for depression in past year                    | 7.6 (6.7-8.5)                                 | 38.0 (33.3-43.0)                                    | 7.48 (5.85-9.55)                                                      | p<0.0001 | 2.6 (2.0-3.4)                                 | 22.4 (17.4-28.3)                                    | 10.12 (6.68-15.33)                                                             | p<0.0001 |
| Treated for other mental health condition in past year | 1.2 (0.8-1.8)                                 | 15.5 (12.0-19.7)                                    | 14.84 (8.99-24.49)                                                    | p<0.0001 | 1.2 (0.8-1.7)                                 | 18.0 (13.4-23.8)                                    | 17.38 (10.19-29.66)                                                            | p<0.0001 |
| Screen positive for current depression                 | 9.7 (8.7-10.8)                                | 24.8 (20.7-29.4)                                    | 3.17 (2.44-4.13)                                                      | p<0.0001 | 8.8 (7.6-10.1)                                | 28.9 (21.7-37.3)                                    | 4.5 (2.97-6.80)                                                                | p<0.0001 |
| <i>≥ 1 physical health condition</i>                   |                                               |                                                     |                                                                       |          |                                               |                                                     |                                                                                |          |
| Yes                                                    | 9.7 (8.6-10.8)                                | 52.3 (47.3-57.3)                                    | 10.26 (8.10-13.01)                                                    | p<0.0001 | 7.1 (6.1-8.4)                                 | 50.4 (43.2-57.6)                                    | 12.67 (9.06-17.73)                                                             | p<0.0001 |
| No                                                     | 90.3 (89.17-91.39)                            | 47.7 (42.7-52.7)                                    |                                                                       |          | 92.9 (91.6-93.9)                              | 49.6 (42.4-56.8)                                    |                                                                                |          |



|                                                                                                   |                  |                  |                     |          |  |                  |                  |                      |          |
|---------------------------------------------------------------------------------------------------|------------------|------------------|---------------------|----------|--|------------------|------------------|----------------------|----------|
| Arthritis                                                                                         | 0.8 (0.6-1.2)    | 9.0 (6.4-12.6)   | 11.45 (6.79-19.29)  | p<0.0001 |  | 0.4 (0.2-0.8)    | 9.1 (4.3-18.4)   | 20.86 (7.38-58.96)   | p<0.0001 |
| Any cardiac or vascular disease                                                                   | 0.1 (0.1-0.3)    | 1.7 (0.9-3.5)    | 14.86 (5.19-42.56)  | p<0.0001 |  | 0.4 (0.1-0.8)    | 4.2 (2.2-8.0)    | 12.08 (4.06-35.95)   | p<0.0001 |
| Hypertension                                                                                      | 1.8 (1.4-2.4)    | 5.0 (3.1-8.0)    | 2.78 (1.56-4.95)    | 0.0006   |  | 0.9 (0.6-1.5)    | 3.1 (1.5-6.4)    | 2.86 (1.18-6.97)     | 0.0204   |
| Diabetes                                                                                          | 0.5 (0.3-0.9)    | 4.1 (2.6-6.5)    | 7.45 (3.73-14.87)   | p<0.0001 |  | 0.2 (0.1-0.6)    | 1.9 (0.7-4.5)    | 9.12 (2.12-39.32)    | 0.003    |
| Epilepsy                                                                                          | 0.3 (0.2-0.6)    | 5.3 (3.5-8.0)    | 16.55 (8.10-33.80)  | p<0.0001 |  | 0.4 (0.2-0.8)    | 7.7 (4.8-12.3)   | 21.04 (8.93-49.57)   | p<0.0001 |
| Chronic airways disease                                                                           | 0.0 (0.0-0.2)    | 0.8 (0.3-2.3)    | 29.39 (3.06-282.67) | 0.0035   |  | 0.0 (0.0-0.2)    | 0.3 (0.0-1.9)    | 12.53 (1.29-121.61)  | 0.0293   |
| Backache, or bone or muscle disease for >3 months, past year                                      | 5.8 (5.0-6.8)    | 24.9 (20.8-29.5) | 5.3 (4.01-7.01)     | p<0.0001 |  | 4.8 (4.0-5.8)    | 24.0 (17.4-32.2) | 5.81 (3.69-9.16)     | p<0.0001 |
| Difficulty walking up a flight of stairs because of a health problem ['much difficulty'/'unable'] | 1.1 (0.8-1.6)    | 28.3 (23.9-33.2) | 33.75 (22.59-50.43) | p<0.0001 |  | 0.5 (0.3-1.0)    | 28.5 (21.8-36.3) | 70.89 (36.44-137.92) | p<0.0001 |
| ≥ 1 physical and/or mental health condition                                                       |                  |                  |                     |          |  |                  |                  |                      |          |
| Both                                                                                              | 3.0 (2.4-3.7)    | 25.5 (21.4-30.0) | 11.04 (8.03-15.19)  | p<0.0001 |  | 1.5 (1.1-2.1)    | 23.4 (16.6-31.9) | 18.75 (10.96-32.08)  | p<0.0001 |
| ≥ 1 mental health condition only                                                                  | 13.1 (11.9-14.4) | 24.2 (20.0-29.0) | 2.14 (1.64-2.78)    | p<0.0001 |  | 10.0 (8.8-11.4)  | 21.2 (16.2-27.3) | 2.53 (1.76-3.65)     | p<0.0001 |
| ≥ 1 physical health condition only                                                                | 7.1 (6.2-8.1)    | 26.8 (22.5-31.7) | 4.78 (3.61-6.32)    | p<0.0001 |  | 5.8 (4.8-7.0)    | 27.2 (21.3-34.0) | 5.65 (3.85-8.30)     | p<0.0001 |
| Either                                                                                            | 76.8 (75.2-78.4) | 23.5 (19.3-28.2) | 0.09 (0.07-0.12)    | p<0.0001 |  | 82.7 (80.9-84.3) | 28.2 (22.1-35.2) | 0.08 (0.06-0.12)     | p<0.0001 |
| 2+ physical and/or mental health                                                                  |                  |                  |                     |          |  |                  |                  |                      |          |

1  
2  
3  
4  
5  
6  
7  
8  
9  
10  
11  
12  
13  
14  
15  
16  
17  
18  
19  
20  
21  
22  
23  
24  
25  
26  
27  
28  
29  
30  
31  
32  
33  
34  
35  
36  
37  
38  
39  
40  
41  
42  
43  
44  
45  
46  
47  
48  
49

|                                |                  |                  |                  |          |  |                  |                  |                  |          |
|--------------------------------|------------------|------------------|------------------|----------|--|------------------|------------------|------------------|----------|
| <i>conditions</i> <sup>1</sup> |                  |                  |                  |          |  |                  |                  |                  |          |
| Yes                            | 3.8 (3.1-4.6)    | 40.6 (35.8-45.7) | 19.2 (14.1-26.2) | p<0.0001 |  | 2.1 (1.6-2.8)    | 39.9 (32.7-47.6) | 42.3 (24.8-69.5) | p<0.0001 |
| No                             | 96.2 (95.4-96.9) | 59.4 (54.3-64.3) |                  |          |  | 97.9 (97.2-98.4) | 60.1 (52.4-67.4) |                  |          |

<sup>1</sup>For the purposes of this variable was classified as *either* screen positive for current depression *or* reporting treatment for depression in the past year

For peer review only

# BMJ Open

## Sexual behaviours and sexual health outcomes among young adults with limiting disabilities: findings from third British National Survey of Sexual Attitudes and Lifestyles (Natsal-3).

|                                 |                                                                                                                                                                                                                                                                                                                                                                                                                                                                                                                                                                                                                                                                                                                                               |
|---------------------------------|-----------------------------------------------------------------------------------------------------------------------------------------------------------------------------------------------------------------------------------------------------------------------------------------------------------------------------------------------------------------------------------------------------------------------------------------------------------------------------------------------------------------------------------------------------------------------------------------------------------------------------------------------------------------------------------------------------------------------------------------------|
| Journal:                        | <i>BMJ Open</i>                                                                                                                                                                                                                                                                                                                                                                                                                                                                                                                                                                                                                                                                                                                               |
| Manuscript ID                   | bmjopen-2017-019219.R1                                                                                                                                                                                                                                                                                                                                                                                                                                                                                                                                                                                                                                                                                                                        |
| Article Type:                   | Research                                                                                                                                                                                                                                                                                                                                                                                                                                                                                                                                                                                                                                                                                                                                      |
| Date Submitted by the Author:   | 27-Apr-2018                                                                                                                                                                                                                                                                                                                                                                                                                                                                                                                                                                                                                                                                                                                                   |
| Complete List of Authors:       | Holdsworth, Elizabeth; London School of Hygiene and Tropical Medicine Faculty of Public Health and Policy, Health Services Research and Policy<br>Trifonova, Viktoriya ; University College London, Department of Infection & Population Health<br>Tanton, Clare; University College London, Research Department of Infection & Population Health<br>Kuper, Hannah; The London School of Hygiene & Tropical Medicine, Clinical Research<br>Datta, Jessica; London School of Hygiene and Tropical Medicine, SEHR<br>Macdowall, Wendy; London School of Hygiene & Tropical Medicine, Centre for Sexual and Reproductive Health Research<br>Mercer, Catherine; University College London, Research Department of Infection and Population Health |
| <b>Primary Subject Heading</b>: | Public health                                                                                                                                                                                                                                                                                                                                                                                                                                                                                                                                                                                                                                                                                                                                 |
| Secondary Subject Heading:      | Sexual health                                                                                                                                                                                                                                                                                                                                                                                                                                                                                                                                                                                                                                                                                                                                 |
| Keywords:                       | PUBLIC HEALTH, REPRODUCTIVE MEDICINE, Persons with disability, Health services for persons with disabilities, Sexual behaviour                                                                                                                                                                                                                                                                                                                                                                                                                                                                                                                                                                                                                |
|                                 |                                                                                                                                                                                                                                                                                                                                                                                                                                                                                                                                                                                                                                                                                                                                               |

SCHOLARONE™  
Manuscripts

1  
2  
3  
4 **Title: Sexual behaviours and sexual health outcomes among young adults with limiting**  
5 **disabilities: findings from third British National Survey of Sexual Attitudes and Lifestyles**  
6 **(Natsal-3).**  
7  
8  
9

10  
11 **Authors:** Elizabeth Holdsworth<sup>1</sup>, Viktoriya Trifonova<sup>2</sup>, Clare Tanton<sup>2</sup>, Hannah Kuper<sup>1</sup>, Jessica  
12 Datta<sup>1</sup>, Wendy Macdowall<sup>1</sup>, Catherine H. Mercer<sup>2</sup>  
13  
14

15  
16 <sup>1</sup>London School of Hygiene & Tropical Medicine, London, UK.  
17

18 <sup>2</sup>University College London, London, UK  
19

20  
21 **Corresponding author:** Elizabeth Holdsworth, Health Service Research and Policy  
22 Department, London School of Hygiene & Tropical Medicine, 15-17 Tavistock Place, London,  
23 WC1H 9SH. [Elizabeth.Holdsworth@lshtm.ac.uk](mailto:Elizabeth.Holdsworth@lshtm.ac.uk). Tel: +44 (0)20 7958 8347. Fax: +44 (0)20  
24 7927 2701.  
25  
26  
27

28 **Key words:** Sexual health, sexual behaviour, reproductive health, public health, disabled  
29 persons, health services for persons with disabilities.  
30  
31  
32  
33  
34  
35  
36  
37  
38  
39  
40  
41  
42  
43  
44  
45  
46  
47  
48  
49  
50  
51  
52  
53  
54  
55  
56  
57  
58  
59  
60

**Abstract:****OBJECTIVE:**

To explore whether the sexual behaviours and sexual health outcomes of young adults with self-reported disabilities that they perceive limit their activities ('limiting disability'), differ from those without disability.

**DESIGN:**

Complex survey analyses of cross-sectional probability sample survey data collected between September 2010 and August 2012 using computer-assisted personal interviewing and computer-assisted self-interview.

**SETTING:**

British general population.

**PARTICIPANTS:**

7435 women and men aged 17-34 years, resident in private households in Britain, interviewed for the third National Survey of Sexual Attitudes and Lifestyles (Natsal-3).

**MAIN OUTCOME MEASURES:**

Self-reported sexual behaviour and sexual health outcomes.

**RESULTS:**

Approximately one-in-ten participants reported having a limiting disability. Sexual behaviours were similar between those with limiting disability and those without, with a few exceptions. Women and men with limiting disability were less likely to report having sexual partner(s) (past year, odds ratios adjusted for age and social class, AORs: 0.71, 0.75, respectively). Women with limiting disability were more likely to report having same-sex partner(s) in the past 5 years (AOR: 2.39). Differences were seen in sexual health outcomes, especially amongst women; those with limiting disability were more likely to report having

1  
2  
3 experienced non-volitional sex (ever, AOR: 3.08), STI diagnoses (ever, AOR: 1.43), and  
4 sought help/advice regarding their sex life (past year, AOR: 1.56). Women with limiting  
5 disability were also more likely to feel distressed/worried about their sex life than those  
6 without limiting disability (AORs: 1.61). None of these associations were seen in men.  
7  
8  
9

## 10 **CONCLUSIONS:**

11  
12  
13 Young adults with limiting disability, especially women, are more likely to report adverse  
14 sexual health outcomes than those without, despite comparatively few behavioural  
15 differences. It is important to ensure that people with disabilities are included in sexual  
16 health promotion and service planning, and targeted policy and programme interventions  
17 are needed to address negative sexual health outcomes disproportionately experienced by  
18 people with disabilities.  
19  
20  
21  
22  
23  
24  
25  
26  
27  
28  
29  
30  
31  
32  
33  
34  
35  
36  
37  
38  
39  
40  
41  
42  
43  
44  
45  
46  
47  
48  
49  
50  
51  
52  
53  
54  
55  
56  
57  
58  
59  
60

### Strengths and limitations of this study

- This paper presents the results of the analysis of a large scale, nationally representative survey, which achieved a response rate in line with other major social surveys completed in Britain around the same time
- It is one of few quantitative studies to explore whether sexual behaviour and sexual health outcomes differ between people with limiting disability and those with no disability, and the only one we know of to date in Britain
- A strength of Natsal-3 is that it used CAPI and specifically CASI to minimise reporting bias for more sensitive questions
- As a cross-sectional survey, chronology cannot always be determined and nor can causality in the associations we show be inferred, e.g. We have no information about the duration of disability, and whether or not a participant's disability preceded their first heterosexual intercourse.

## Introduction

The United Nations Convention on the Rights of Persons with Disabilities defines disability as “those who have long-term physical, mental, intellectual or sensory impairments which in interaction with various barriers may hinder their full and effective participation in society on an equal basis with others.”[1] It is estimated that there are one billion people living with a disability worldwide[2], and in Britain there are over eleven million people with a limiting long-term illness, impairment or disability, equating to almost one in six of the population[3]. From both human rights and public health perspectives, it is important that sexual and reproductive health (SRH) services are inclusive of this large group, since sexual health and sexual satisfaction are recognised as significant predictors of quality of life and general life satisfaction [4,5]. However, it is argued that the sexuality and sexual health of people with disabilities have traditionally been neglected [6,7]. This may be a result of misconceptions that disabled people are asexual [7-11] or because the sexual well-being of people with disabilities is of less concern than rehabilitation and other health priorities [12,13]. This is despite evidence from qualitative research highlighting the same need for sexual health services among those with disabilities as in the wider population [5]. Negative experiences with healthcare professionals are commonly reported by people with disabilities, these include a failure to discuss sex because professionals do not think the topic pertinent [9]. Findings also identify unmet need for support for problems with sexual function [14,15] and sexual satisfaction [5]. However, there is an absence of reliable, empirical evidence from large-scale, population-level surveys that explore the sexual lifestyles and experiences of disabled people in Britain.

Britain’s third National Survey of Sexual Attitudes and Lifestyles (Natsal-3), a probability sample survey, offers an opportunity to address these evidence gaps. Earlier analyses of Natsal-3 data highlighted differences in sexual experiences between people with disabilities and those without including the increased prevalence of ‘non-volitional’ or ‘non-consensual’ sex reported by people with disabilities [16], and the association between poor health and decreased sexual activity and satisfaction [17]. This paper seeks to explore in greater depth the sexual behaviours and sexual health outcomes reported by people with and without



1  
2  
3 limiting disabilities, specifically among young people as the age group at the highest risk of  
4 negative sexual health outcomes [18-20].  
5  
6  
7

## 8 9 **Methods**

### 10 11 **Participants and procedures**

12  
13  
14 Natsal-3 was a stratified probability sample survey of 15,162 men and women aged 16 to 74  
15 years, resident in households in Britain, who were interviewed 2010-2012. Details of the  
16 methodology are described in detail elsewhere [21], and the questionnaire and technical  
17 report are available online ([www.natsal.ac.uk](http://www.natsal.ac.uk)). Natsal-3 was granted ethical approval from  
18 the Oxford A NHS Research Ethics Committee (reference: 09/H0604/27). Participants  
19 provided oral consent. Participants completed the survey through a combination of face-to-  
20 face computer-assisted personal interview (CAPI) and computer-assisted self-interview  
21 (CASI) for the more sensitive questions.  
22  
23  
24  
25  
26  
27  
28

29  
30 In the CAPI section of the interview, all participants were asked *“Do you have any long-*  
31 *standing illness, disability or infirmity?”* in which *“long-standing”* was defined as *“anything*  
32 *that has troubled you over a period of time, or that is likely to affect you over a period of*  
33 *time”*. Participants who answered *“yes”* were routed to the question: *“Does this limit your*  
34 *activities in any way?”*. Participants who reported *“yes”* were defined for the purposes of  
35 this analysis as having *“limiting disability”*. This definition concurs with that used for the  
36 Equality Act in the UK[22] and the United Nations Convention on the Rights of Persons with  
37 Disabilities[1]. In this paper we compared those reporting limiting disability with those  
38 reporting no long-standing illness or disability. This means that our comparative analyses  
39 exclude participants reporting a non-limiting disability, because they cannot easily be  
40 categorised either as *“disabled”* or *“non-disabled”* according to the prevailing  
41 conceptualization of disability [23].  
42  
43  
44  
45  
46  
47  
48  
49  
50

51 To obtain information about self-reported clinical diagnoses of a range of health conditions,  
52 interviewers in the CAPI showed participants cards listing a number of different conditions  
53 and asked whether they had been diagnosed with any of those listed. These included  
54  
55  
56  
57  
58  
59  
60

1  
2  
3 mental and physical health conditions (e.g. depression, arthritis, cardiac diseases, diabetes,  
4 epilepsy, broken hip or pelvis, backache or bone or muscle disease) lasting for more than 3  
5 months in the past year.  
6  
7

8  
9 Participants were also asked about their first sexual experiences in the CAPI through  
10 showcards, and then in the CASI they were asked questions about their experience of sexual  
11 practices, numbers of sexual partners in different timeframes, their recent partnerships,  
12 sexual function and sexual health, including STI diagnosis. The interview concluded with  
13 another CAPI, which included standard demographic questions about educational  
14 attainment, employment, sexual identity and ethnicity.  
15  
16  
17  
18

19  
20 The overall estimated response rate to Natsal-3 was 57.7%, while among those aged 16-34,  
21 it was estimated as 64.8% [24]. For this analysis, we focused on participants aged 17-34,  
22 excluding 16 year olds, as one of our key demographic variables is educational attainment  
23 and therefore all participants in our sample will have had the chance to attain qualifications  
24 obtained by the UK school leaving age of 16. We can also differentiate between those who  
25 left school at that point and those who went onto study for qualifications typically gained  
26 aged 17+.  
27  
28  
29  
30  
31  
32

### 33 **Statistical analysis**

34  
35 We completed statistical analyses using the survey functions of Stata (version 14.1) to take  
36 account of the stratification, weighting and clustering of the Natsal-3 dataset. The data were  
37 weighted to adjust for the unequal probabilities of selection and non-response, and  
38 corrected for differences in gender, age and regional distribution according to the UK 2011  
39 census, so that the data are broadly representative of the resident general population in  
40 Britain [24].  
41  
42  
43  
44  
45  
46

47  
48 We initially estimated the prevalence of reporting a limiting disability among all young  
49 people, and also the prevalence of reporting a disability that was *not* perceived as limiting.  
50 We then examined the prevalence of health conditions that were asked about in Natsal-3  
51 according to whether participants reported a limiting disability or no disability at all, in order  
52 to provide context, although we recognise that these conditions may or may not be the  
53  
54  
55  
56  
57  
58  
59  
60

1  
2  
3 cause of participants' limiting disability (Supplementary Table). Our binary variable of  
4 reporting "limiting disability" or "no disability" was then initially treated as a dependent  
5 (outcome) variable to examine how prevalence varies by key socio-demographic factors. In  
6 subsequent analyses we used this variable as an independent (response) variable to  
7 consider how reporting sexual behaviours and sexual health-outcomes vary for those with a  
8 limiting disability in comparison to those without. We present prevalence estimates and  
9 adjusted odds ratios (AOR) with 95% confidence intervals. We used multivariable logistic  
10 regression to calculate ORs adjusted for potential confounding variables, specifically age,  
11 and individual-level socio-economic status (measured according to the National Statistics  
12 Socio-economic Classification, NS-SEC [25]).  
13  
14  
15  
16  
17  
18  
19

### 20 21 **Role of funding source**

22  
23  
24 This research paper received no specific grant from any funding agency in the public,  
25 commercial or not-for-profit sectors. The Natsal-3 study was supported by grants from the  
26 Medical Research Council [G0701757]; and the Wellcome Trust [084840]; with contributions  
27 from the Economic and Social Research Council and Department of Health. The sponsors of  
28 the original Natsal-3 study had no role in study design, data collection, data analysis, data  
29 interpretation, or writing of this paper.  
30  
31  
32  
33  
34

### 35 **Patient and Public Involvement**

36  
37  
38 Patients or members of the public were not involved in the development, design, or conduct  
39 of this study.  
40  
41  
42  
43  
44

### 45 **Results**

#### 46 47 ***Prevalence of limiting disability and most commonly reported health conditions***

48  
49  
50 Of all participants aged 17-34, 11.0% (95% CI: 10.0%-12.1%) of women and 8.2% (95% CI:  
51 7.1%-9.4%) of men reported having an illness, disability or infirmity that limited their  
52 activities (Table 1).  
53  
54  
55  
56  
57  
58  
59  
60

1  
2  
3 A further 9.9% (95% CI: 8.9%-10.9%) of all women and 8.1% (95% CI: 7.1%-9.3%) of all men  
4 in this age-group reported a disability that they did not perceive as limiting their activities  
5 (data not shown). These participants with non-limiting disability (439 women and 255 men)  
6 correspond to approximately half of all participants in this age range who reported a  
7 disability and are excluded from subsequent analyses. Overall, the majority of women and  
8 men with limiting disability reported having one or more physical and/or mental health  
9 condition (76.5% women; 71.8% men - conditions shown in Supplementary Table). Relative  
10 to those reporting no disability, mental health conditions were reported by a large  
11 proportion of those with limiting disability: 50% of women (AOR 5.19) and 45% of men (AOR  
12 6.25). Depression was the most commonly reported mental health condition by men and  
13 women with limiting disability. Physical health conditions were also more frequently  
14 reported by those with limiting disability, with 50% of men (AOR 12.67) and 52% of women  
15 (AOR 10.26) reporting one or more physical health condition. Having difficulty or being  
16 unable to walk up a flight of stairs, and having backache or bone or muscle disease for more  
17 than 3 months in the past year were the physical conditions most commonly reported by  
18 participants with limiting disability. Those with limiting disability had high levels of  
19 comorbidity with 40.6% of women and 39.9% of men with limiting disability reporting 2 or  
20 more physical and/or mental health conditions (AOR 19.2 and AOR 42.3 respectively).  
21  
22  
23  
24  
25  
26  
27  
28  
29  
30  
31  
32  
33  
34

### 35 ***Variation in the reporting of limiting disability by key sociodemographic characteristics***

36  
37  
38 Prevalence of limiting disability increased with age in men, but not women (Table 1). Among  
39 women, prevalence of limiting disability was lower in those of Black/Black British ethnicity  
40 than those of other ethnicities and higher among those not currently in a steady  
41 relationship. There was no overall statistically significant association with relationship status  
42 for either gender. Although the numbers of participants not identifying as heterosexual was  
43 small, prevalence of limiting disability was higher among women who did not, including  
44 after adjustment relative to women identifying as heterosexual. There was an association  
45 with socioeconomic status for both genders, with those reporting currently having no job  
46 (AOR 5.88 for men and 2.94 for women) or being a student (AOR 1.78 for men and AOR 1.47  
47 for women) more likely to report limiting disability. Men and women with no academic  
48 qualifications were also more likely to report having limiting disability. We found no  
49  
50  
51  
52  
53  
54  
55  
56  
57  
58  
59  
60

1  
2  
3 variation by deprivation area of residence as measured by the Index of Multiple Deprivation  
4 [26].  
5  
6  
7  
8  
9  
10  
11  
12  
13  
14  
15  
16  
17  
18  
19  
20  
21  
22  
23  
24  
25  
26  
27  
28  
29  
30  
31  
32  
33  
34  
35  
36  
37  
38  
39  
40  
41  
42  
43  
44  
45  
46  
47  
48  
49  
50  
51  
52  
53  
54  
55  
56  
57  
58  
59  
60

For peer review only

Table 1. Variation in the reporting of limiting disability by key sociodemographic characteristics among Natsal-3 participants aged 17-34, by gender

|                                          | WOMEN                             |                                          |                                                | MEN                               |                                          |                                                |
|------------------------------------------|-----------------------------------|------------------------------------------|------------------------------------------------|-----------------------------------|------------------------------------------|------------------------------------------------|
|                                          | Unweighted, weighted denominators | % (95% CI) reporting limiting disability | AOR* (95% CI) of reporting limiting disability | Unweighted, weighted denominators | % (95% CI) reporting limiting disability | AOR* (95% CI) of reporting limiting disability |
| <i>All</i>                               | <b>3953/2228</b>                  | <b>11.0 (10.0-12.1)</b>                  |                                                | <b>2786/2284</b>                  | <b>8.2 (7.1-9.4)</b>                     |                                                |
| <i>Age</i>                               |                                   |                                          | P=0.2486                                       |                                   |                                          | P<0.0001                                       |
| 17-19                                    | 694/369                           | 10.4 (8.0-13.4)                          | Reference category                             | 598/378                           | 5.1 (3.5-7.4)                            | Reference category                             |
| 20-24                                    | 1054/632                          | 10.2 (8.4-12.4)                          | 0.99 (0.68-1.46)                               | 805/648                           | 6.5 (4.8-8.8)                            | 1.5 (0.87-2.59)                                |
| 25-29                                    | 1264/626                          | 11.2 (9.5-13.1)                          | 1.2 (0.82-1.76)                                | 806/652                           | 9.4 (7.5-11.6)                           | 2.8 (1.68-4.66)                                |
| 30-34                                    | 941/600                           | 12.0 (10.0-14.3)                         | 1.33 (0.89-1.99)                               | 577/606                           | 10.5 (7.9-13.9)                          | 3.15 (1.81-5.48)                               |
| <i>Ethnicity</i>                         |                                   |                                          | P=0.0039                                       |                                   |                                          | P=0.3076                                       |
| White                                    | 3327/1818                         | 11.6 (10.5-12.8)                         | Reference category                             | 2350/1851                         | 8.7 (7.6-10.0)                           | Reference category                             |
| Mixed                                    | 130/70                            | 16.1 (9.2-26.8)                          | 1.41 (0.72-2.76)                               | 81/68                             | 7.9 (3.6-16.6)                           | 0.78 (0.33-1.86)                               |
| Asian/Asian British                      | 259/184                           | 7.9 (5.2-11.8)                           | 0.52 (0.31-0.86)                               | 199/224                           | 5.7 (2.0-15.1)                           | 0.61 (0.20-1.85)                               |
| Black/Black British                      | 156/100                           | 3.8 (1.5-9.2)                            | 0.29 (0.11-0.73)                               | 99/89                             | 5.3 (2.1-12.9)                           | 0.53 (0.20-1.42)                               |
| Chinese/other <sup>1</sup>               | 71/50                             | 7.0 (2.0-21.5)                           | 0.51 (0.14-1.86)                               | 51/48                             | 3.0 (0.6-13.0)                           | 0.28 (0.06-1.25)                               |
| <i>Relationship status</i>               |                                   |                                          | P=0.0568                                       |                                   |                                          | P=0.6962                                       |
| Living with a partner                    | 1738/1083                         | 10.5 (9.1-12.1)                          | Reference category                             | 983/956                           | 8.7 (6.8-10.9)                           | Reference category                             |
| In a steady relationship, not cohabiting | 915/447                           | 10.3 (8.4-12.5)                          | 1.13 (0.83-1.53)                               | 616/453                           | 7.7 (5.8-10.3)                           | 1.22 (0.77-1.92)                               |
| No steady relationship                   | 1253/673                          | 12.5 (10.6-14.7)                         | 1.39 (1.06-1.83)                               | 1148/848                          | 7.6 (6.2-9.4)                            | 1.14 (0.76-1.70)                               |
| <i>Sexual identity<sup>2</sup></i>       |                                   |                                          | P<0.0001                                       |                                   |                                          | P=0.1344                                       |

|                                                               |           |                  |                    |           |                  |                    |
|---------------------------------------------------------------|-----------|------------------|--------------------|-----------|------------------|--------------------|
| Heterosexual/straight                                         | 3779/2127 | 10.3 (9.4-11.4)  | Reference category | 2678/2201 | 8.1 (7.0-9.3)    | Reference category |
| Gay/lesbian                                                   | 43/24     | 18.7 (9.4-33.6)  | 2.21 (1.02-4.77)   | 61/45     | 13.4 (7.0-23.9)  | 1.99 (1.00-3.99)   |
| Bisexual                                                      | 105/59    | 28.5 (18.8-40.8) | 3.72 (2.12-6.51)   | 29/22     | 8.9 (2.6-26.5)   | 1.37 (0.40-4.76)   |
| <i>National Statistics Socio-Economic Classification</i>      |           |                  |                    |           |                  |                    |
| Manager/professional                                          | 940/565   | 8.3 (6.6-10.4)   | Reference category | 698/639   | 6.1 (4.1-9.1)    | Reference category |
| Intermediate                                                  | 705/393   | 10.2 (8.1-12.8)  | 1.29 (0.90-1.86)   | 353/299   | 11.6 (8.5-15.7)  | 2.12 (1.22-3.70)   |
| Semi-routine/routine                                          | 1221/632  | 12.6 (10.8-14.8) | 1.73 (1.26-2.37)   | 983/762   | 8.6 (6.9-10.6)   | 1.76 (1.08-2.88)   |
| No job currently                                              | 313/173   | 19.5 (15.1-24.8) | 2.94 (1.96-4.42)   | 115/83    | 19.0 (12.5-27.8) | 5.88 (3.00-11.53)  |
| Student                                                       | 750/453   | 9.5 (7.3-12.3)   | 1.47 (0.96-2.25)   | 624/4487  | 6.1 (4.2-8.7)    | 1.78 (0.96-3.29)   |
| <i>Academic qualifications<sup>3</sup></i>                    |           |                  |                    |           |                  |                    |
| No academic qualifications                                    | 341/167   | 19.9 (15.4-25.3) | Reference category | 218/171   | 20.4 (15.7-26.2) | Reference category |
| Qualifications typically gained at age 16                     | 1203/605  | 14.3 (12.3-16.6) | 0.79 (0.55-1.13)   | 853/657   | 9.7 (7.8-11.9)   | 0.47 (0.31-0.71)   |
| Studying for or have attained further academic qualifications | 2253/1355 | 8.7 (7.5-10.0)   | 0.48 (0.33-0.72)   | 1625/1364 | 6.2 (4.8-7.9)    | 0.29 (0.18-0.48)   |
| <i>Quintile of IMD</i>                                        |           |                  |                    |           |                  |                    |
| Least deprived (1,2)                                          | 1238/702  | 11.0 (9.2-13.2)  | Reference category | 962/756   | 7.0 (5.4-8.9)    | Reference category |
| 3                                                             | 785/462   | 10.5 (8.5-12.9)  | 0.88 (0.64-1.21)   | 529/431   | 7.7 (4.9-11.8)   | 1.04 (0.60-1.83)   |
| Most deprived (4,5)                                           | 1930/1064 | 11.1 (9.7-12.7)  | 0.85 (0.66-1.11)   | 1295/1097 | 9.2 (7.6-11.0)   | 1.16 (0.82-1.63)   |

\* Odds ratio adjusted for age and social class.

<sup>1</sup> Chinese and other subcategories were merged because of small numbers in these categories.

<sup>2</sup> Excludes those reporting 'other' to the question about sexual identity as this was reported by too few participants to provide robust estimates.

<sup>3</sup> Applies only to respondents aged 17+ years.

### ***Association between limiting disability and sexual behaviour***

Those with limiting disability were no different to those without limiting disability in terms of the number of sexual partners reported (including those where condoms were not used), or in the frequency of sex reported (Table 2). In terms of reporting sexual practices, vaginal sex in the past month was the only practice where there was a difference, with this less commonly reported by women with limiting disability than those without (AOR 0.75). Compared to women with no limiting disability, those with limiting disability were more likely to report having same-sex partner(s) in the last five years (AOR 2.39), but this was not observed in men. Differences were also observed in terms of where male and female participants met their most recent partner. For example, those reporting limiting disability were more likely to have done so via the internet than those with no disability (9.5% vs. 4.7% for women and 10.9% vs. 5.4% for men). Women with limiting disability reported a shorter time between meeting and first sex with their most recent partner than women with no disability, and were more likely to report having just, or recently, met their most recent partner when they first had sex together (AOR 1.49 for within 24 hours). These associations were not observed in men.



Table 2: Variations in the reporting of key sexual behaviours among Natsal-3 participants aged 17-34 by limiting disability status and gender.

|                                                                   | WOMEN                                                     |                                                               |         | MEN                                                       |                                                               |         |
|-------------------------------------------------------------------|-----------------------------------------------------------|---------------------------------------------------------------|---------|-----------------------------------------------------------|---------------------------------------------------------------|---------|
|                                                                   | % (95% CI) of those reporting no disability (n=3495/1983) | % (95% CI) of those reporting limiting disability (n=458/245) | p-value | % (95% CI) of those reporting no disability (n=2539/2098) | % (95% CI) of those reporting limiting disability (n=247/186) | p-value |
| <i>Number of partners<sup>†</sup>, past year</i>                  |                                                           |                                                               |         |                                                           |                                                               |         |
| 0                                                                 | 11.8 (10.5-13.2)                                          | 14.6 (11.3-18.7)                                              |         | 12.7 (11.3-14.3)                                          | 14.4 (10.2-19.9)                                              |         |
| 1                                                                 | 68.4 (66.5-70.2)                                          | 63.0 (57.8-67.8)                                              |         | 59.5 (57.2-61.7)                                          | 60.0 (52.7-66.8)                                              |         |
| ≥ 2                                                               | 19.8 (18.4-21.4)                                          | 22.4 (18.2-27.2)                                              |         | 27.8 (25.9-29.8)                                          | 25.6 (20.1-32.0)                                              |         |
| AOR* † (0 vs. ≥ 1)                                                | 1                                                         | 0.71 (0.50-1.02)                                              | 0.061   | 1                                                         | 0.75 (0.48-1.19)                                              | 0.226   |
| <i>Number of partners<sup>†</sup> without a condom, past year</i> |                                                           |                                                               |         |                                                           |                                                               |         |
| 0                                                                 | 25.4 (23.7-27.2)                                          | 27.4 (22.9-32.5)                                              |         | 31.3 (29.1-33.5)                                          | 28.9 (22.9-35.7)                                              |         |
| 1                                                                 | 64.0 (62.1-65.9)                                          | 61.2 (56.1-66.0)                                              |         | 55.6 (53.2-57.9)                                          | 57.1 (49.7-64.2)                                              |         |
| ≥ 2                                                               | 10.6 (9.5-11.8)                                           | 11.4 (8.8-14.7)                                               |         | 13.2 (11.7-14.7)                                          | 14.0 (10.0-19.3)                                              |         |
| AOR* †                                                            | 1                                                         | 1.13 (0.82-1.55)                                              | 0.45    | 1                                                         | 1.22 (0.81-1.85)                                              | 0.34    |
| <i>Number of occasions of sex<sup>†</sup>, past 4 weeks</i>       |                                                           |                                                               |         |                                                           |                                                               |         |
| 0-2                                                               | 45.4 (43.4-47.5)                                          | 50.1 (44.8-55.4)                                              |         | 47.4 (45.2-49.7)                                          | 51.5 (43.8-59.1)                                              |         |
| 3-4                                                               | 17.2 (15.8-18.8)                                          | 19.0 (15.1-23.7)                                              |         | 17.1 (15.5-18.9)                                          | 12.9 (8.6-18.8)                                               |         |
| 5+                                                                | 37.3 (35.4-39.3)                                          | 30.8 (26.1-36.0)                                              |         | 35.4 (33.3-37.6)                                          | 35.6 (28.9-42.9)                                              |         |
| AOR* †                                                            | 1                                                         | 1.24 (0.98-1.55)                                              | 0.07    | 1                                                         | 1.24 (0.87-1.75)                                              | 0.232   |

1  
2  
3  
4  
5  
6  
7  
8  
9  
10  
11  
12  
13  
14  
15  
16  
17  
18  
19  
20  
21  
22  
23  
24  
25  
26  
27  
28  
29  
30  
31  
32  
33  
34  
35  
36  
37  
38  
39  
40  
41  
42  
43  
44  
45  
46  
47

|                                                                    |                  |                     |         |                  |                  |        |
|--------------------------------------------------------------------|------------------|---------------------|---------|------------------|------------------|--------|
| <i>Vaginal sex, past month</i>                                     | 70.3 (68.6-72.0) | 65.4 (60.2-70.3)    |         | 66.5 (64.4-68.5) | 67.0 (60.4-73.0) |        |
| AOR* †                                                             | 1                | 0.75 (0.59-0.95)    | 0.016   | 1                | 0.93 (0.68-1.27) | 0.636  |
| <i>Given/received oral sex<sup>1</sup>, past month</i>             | 54.2 (52.3-56.2) | 50.61 (45.56-55.64) |         | 56.0 (53.8-58.2) | 55.4 (48.2-62.3) |        |
| AOR* †                                                             | 1                | 0.88 (0.71-1.09)    | 0.252   | 1                | 1.01 (0.75-1.37) | 0.923  |
| <i>Genital contact without intercourse<sup>1</sup>, last month</i> | 53.7 (51.8-55.6) | 50.9 (45.8-56.0)    |         | 53.8 (51.5-56.1) | 47.6 (40.4-55.0) |        |
| AOR* †                                                             | 1                | 0.91 (0.73-1.14)    | 0.409   | 1                | 0.82 (0.59-1.14) | 0.238  |
| <i>Same-sex partner(s), past 5 years</i>                           | 5.0 (4.2-5.8)    | 10.4 (7.5-14.2)     |         | 3.2 (2.5-4.0)    | 4.1 (2.4-7.0)    |        |
| AOR* †                                                             | 1                | 2.39 (1.61-3.54)    | <0.0001 | 1                | 1.35 (0.73-2.48) | 0.339  |
| <i>Where first met most recent partner</i>                         |                  |                     |         |                  |                  |        |
| School/work                                                        | 36.0 (34.1-37.9) | 29.0 (24.4-34.0)    |         | 41.2 (38.9-43.5) | 28.0 (20.6-36.7) |        |
| Online/internet dating                                             | 4.7 (4.0-5.6)    | 9.5 (6.9-13.0)      | 0.0007  | 5.4 (4.4-6.7)    | 10.9 (7.1-16.4)  |        |
| Always known each other/neighbour                                  | 7.0 (6.0-8.1)    | 8.1 (5.7-11.4)      |         | 4.9 (4.0-6.0)    | 6.0 (3.5-10.2)   | 0.0003 |
| Public place                                                       | 20.3 (18.8-21.9) | 18.9 (15.1-23.4)    |         | 21.8 (20.0-23.7) | 18.2 (13.3-24.5) |        |
| Other                                                              | 32.0 (30.2-33.8) | 34.5 (29.6-39.8)    |         | 26.6 (24.6-28.8) | 36.9 (30.0-44.4) |        |
| <i>Time between first meeting</i>                                  |                  |                     |         |                  |                  |        |

|                                                                               |                  |                  |          |                  |                  |       |
|-------------------------------------------------------------------------------|------------------|------------------|----------|------------------|------------------|-------|
| <i>most recent partner and first sex</i>                                      |                  |                  |          |                  |                  |       |
| <b>24 hours or less</b>                                                       | 5.2 (4.4-6.2)    | 9.9 (7.1-13.7)   |          | 9.2 (7.9-10.6)   | 11.4 (7.6-16.7)  |       |
| <b>Between 1 day and 1 week</b>                                               | 7.7 (6.7-8.9)    | 9.8 (7.1-13.4)   |          | 9.8 (8.5-11.2)   | 8.9 (5.6-13.8)   |       |
| Between 1 week and 6 months                                                   | 56.2 (54.2-58.2) | 50.9 (45.3-56.4) |          | 54.5 (52.1-56.9) | 49.9 (41.7-58.1) |       |
| Between 6 months and 5 years                                                  | 26.0 (24.3-27.7) | 23.3 (18.9-28.4) |          | 22.6 (20.6-24.8) | 23.9 (16.5-33.2) |       |
| 5 years or more                                                               | 4.9 (4.0-5.9)    | 6.0 (4.0-8.9)    |          | 3.9 (3.1-5.0)    | 6.0 (3.3-10.5)   |       |
| AOR* †                                                                        | 1                | 1.49 (1.09-2.02) | 0.012    | 1                | 1.01 (0.70-1.47) | 0.94  |
|                                                                               |                  |                  |          |                  |                  |       |
| <i>Condom not used on first occasion with most recent partner<sup>2</sup></i> |                  |                  |          |                  |                  |       |
|                                                                               | 35.4 (33.4-37.5) | 40.4 (35.0-46.0) |          | 38.2 (35.8-40.6) | 46.9 (38.0-56.1) |       |
| AOR* †                                                                        | 1                | 1.12 (0.88-1.43) | 0.343    | 1                | 1.24 (0.84-1.83) | 0.275 |
|                                                                               |                  |                  |          |                  |                  |       |
| <i>Relationship status at first sex with most recent partner</i>              |                  |                  |          |                  |                  |       |
| <b>Just met/had met recently</b>                                              | 20.8 (19.1-22.5) | 33.8 (28.8-39.2) |          | 29.4 (27.1-31.7) | 32.3 (25.1-40.5) |       |
| Know each other/used to be in a relationship                                  | 25.1 (23.3-26.9) | 21.8 (17.6-26.7) |          | 27.9 (25.7-30.1) | 25.2 (18.9-32.7) |       |
| Steady relationship/living together/married                                   | 54.2 (52.1-56.2) | 44.4 (38.9-50.0) |          | 42.8 (40.3-45.3) | 42.5 (33.6-51.9) |       |
| AOR* †                                                                        | 1                | 1.93 (1.48-2.51) | P<0.0001 | 1                | 1.14 (0.78-1.66) | 0.493 |
|                                                                               |                  |                  |          |                  |                  |       |

\*Odds ratio adjusted for age and social class

1  
2  
3  
4  
5  
6  
7  
8  
9  
10  
11  
12  
13  
14  
15  
16  
17  
18  
19  
20  
21  
22  
23  
24  
25  
26  
27  
28  
29  
30  
31  
32  
33  
34  
35  
36  
37  
38  
39  
40  
41  
42  
43  
44  
45  
46  
47

†Adjusted odds ratio for reporting the responses in bold font (for those variables with  $\geq 2$  response options) relative to 'no disability'

<sup>1</sup> Opposite-sex and/or same-sex partner

<sup>2</sup> Respondents who only had oral sex on the most recent occasion were excluded

For peer review only

### ***Circumstances of sexual debut by disability status***

We found differences by limiting disability status in the circumstances of sexual debut among women, (Table 3). Women with limiting disability were more likely to report earlier sexual debut (aged under 16 at first heterosexual intercourse versus aged 16 or older, AOR 1.64), and to report that they had to be persuaded or were forced (AOR 1.94) at first sex. Women with limiting disability were also more likely to be categorised as lacking 'sexual competence'<sup>1</sup> at first heterosexual intercourse (AOR 1.31 relative to those reporting no disability).

---

<sup>1</sup> On the assumption that first intercourse should, ideally, be characterised by absence of duress and regret, autonomy of decision, and use of a reliable method of contraception, four variables relating to circumstances: regret, willingness, autonomy, and contraception at first intercourse, were used as criteria in the construction of a measure of sexual competence [27].

Table 3: Variations in the reporting of circumstances relating to sexual debut among Natsal-3 participants aged 17-34 by limiting disability status and gender

|                                                                  | WOMEN                                                     |                                                               |         | MEN                                                           |                                                               |         |
|------------------------------------------------------------------|-----------------------------------------------------------|---------------------------------------------------------------|---------|---------------------------------------------------------------|---------------------------------------------------------------|---------|
|                                                                  | % (95% CI) of those reporting no disability (n=3495/1983) | % (95% CI) of those reporting limiting disability (n=458/245) | p-value | Men % (95% CI) of those reporting no disability (n=2539/2098) | % (95% CI) of those reporting limiting disability (n=247/186) | p-value |
| <i>Age at first heterosexual intercourse</i>                     |                                                           |                                                               |         |                                                               |                                                               |         |
| 13-15                                                            | 27.8 (26.1-29.6)                                          | 39.6 (34.6-44.9)                                              |         | 29.8 (27.8-32.0)                                              | 36.4 (29.4-44.0)                                              |         |
| 16-17                                                            | 43.3 (41.3-45.3)                                          | 39.8 (34.7-45.0)                                              |         | 39.6 (37.3-41.9)                                              | 35.8 (28.7-43.6)                                              |         |
| 18-19                                                            | 16.4 (15.0-18.0)                                          | 12.3 (9.2-16.3)                                               |         | 20.0 (18.2-22.0)                                              | 19.6 (14.3-26.3)                                              |         |
| ≥ 20                                                             | 12.5 (10.9-14.1)                                          | 8.3 (5.8-11.7)                                                |         | 10.6 (9.1-12.2)                                               | 8.2 (3.2-19.3)                                                |         |
| AOR**†                                                           | 1                                                         | 1.64 (1.29-2.09)                                              | 0.0001  | 1                                                             | 1.36 (0.98-1.89)                                              | 0.0682  |
| <i>Willingness at first heterosexual intercourse<sup>1</sup></i> |                                                           |                                                               |         |                                                               |                                                               |         |
| Both willing                                                     | 82.8 (81.2-84.3)                                          | 76.0 (71.1-80.4)                                              |         | 91.1 (89.6-92.3)                                              | 88.9 (83.5-92.7)                                              |         |
| Respondent more willing                                          | 1.3 (0.9-1.8)                                             | 2.4 (1.1-5.1)                                                 |         | 3.5 (2.6-4.6)                                                 | 2.1 (0.9-5.0)                                                 |         |
| Partner more willing, respondent also willing                    | 6.7 (5.7-7.9)                                             | 4.5 (2.8-7.4)                                                 |         | 3.4 (2.7-4.3)                                                 | 7.1 (4.1-12.1)                                                |         |
| Respondent had to be persuaded                                   | 8.1 (7.1-9.3)                                             | 13.3 (10.0-17.5)                                              |         | 1.9 (1.4-2.7)                                                 | 1.9 (0.7-5.2)                                                 |         |

|                                                                             |                  |                  |         |  |                  |                  |        |
|-----------------------------------------------------------------------------|------------------|------------------|---------|--|------------------|------------------|--------|
| <b>Respondent was forced</b>                                                | 1.1 (0.8-1.6)    | 3.7 (2.1-6.3)    |         |  | 0.1 (0.0-0.4)    | 0                |        |
| AOR**†                                                                      | 1                | 1.94 (1.41-2.66) | <0.0001 |  | -                | -                |        |
| <i>Lack of sexual competence at first heterosexual intercourse</i>          | 48.8 (46.9-50.7) | 57.8 (52.6-62.8) |         |  | 44.8 (42.4-47.3) | 47.4 (39.5-55.4) |        |
| AOR**†                                                                      | 1                | 1.31 (1.04-1.65) | 0.0218  |  | 1                | 0.95 (0.68-1.33) | 0.7788 |
| <i>Lack of autonomy at first heterosexual intercourse</i> <sup>2</sup>      | 39.1 (37.1-41.1) | 36.4 (31.3-41.8) |         |  | 47.6 (45.3-50.0) | 43.4 (35.7-51.5) |        |
| AOR**†                                                                      | 1                | 0.90 (0.70-1.14) | 0.376   |  | 1                | 0.82 (0.58-1.16) | 0.266  |
| <i>Opinion now of timing of first heterosexual intercourse</i> <sup>3</sup> |                  |                  |         |  |                  |                  |        |
| <b>Should have waited longer</b>                                            | 32.3 (30.5-34.2) | 38.2 (33.3-43.4) |         |  | 16.6 (15.0-18.4) | 22.4 (17.0-28.9) |        |
| Should not have waited so long                                              | 3.1 (2.4-3.9)    | 4.9 (2.9-8.1)    |         |  | 7.0 (5.9-8.3)    | 5.1 (2.7-9.3)    |        |
| About the right time                                                        | 64.6 (62.8-66.4) | 56.9 (51.6-62.0) |         |  | 76.3 (74.3-78.3) | 72.5 (65.5-78.6) |        |
| AOR**†                                                                      | 1                | 1.21 (0.96-1.52) | 0.1136  |  | 1                | 1.38 (0.95-2.00) | 0.0871 |
| <i>Reliable contraception not used at first sex</i> <sup>3</sup>            | 14.0 (12.7-15.4) | 18.7 (14.9-23.3) |         |  | 17.8 (15.9-19.7) | 24.4 (18.5-31.5) |        |
| AOR**†                                                                      | 1                | 1.16 (0.85-1.59) | 0.335   |  | 1                | 1.21 (0.84-1.75) | 0.3134 |

1  
2  
3  
4  
5  
6  
7  
8  
9  
10  
11  
12  
13  
14  
15  
16  
17  
18  
19  
20  
21  
22  
23  
24  
25  
26  
27  
28  
29  
30  
31  
32  
33  
34  
35  
36  
37  
38  
39  
40  
41  
42  
43  
44  
45  
46  
47

\*Odds ratio adjusted for age and social class

† Adjusted odds ratio for reporting the responses in bold font (for those variables with  $\geq 2$  response options) relative to 'no disability'

<sup>1</sup> Not sufficient numbers to report odds ratio for men

<sup>2</sup> Reasons for first intercourse: peers doing it; bit drunk; smoked some cannabis; taken some other drugs.

<sup>3</sup> Applies to respondents not forced

For peer review only



### ***Variations in the reporting of sexual health outcomes by disability status***

Women with limiting disability were more likely to report having ever experienced non-volitional sex than women without disability (AOR 3.08), with a higher AOR also for attempted non-volitional sex (AOR 2.50) (Table 4). Women with limiting disability were also more likely to STI diagnosis/es (ever) (AOR 1.52) and relatedly, having attended a sexual health clinic (ever, AOR 1.26). Women with limiting disability were more likely than those without disability to disclose that they were distressed or worried about their sex lives (AORs 1.61), and one-third of women with limiting disability reported having sought help or advice for their sex life in the past year and were more likely to have done so than women with no disability (approximately one-quarter; AOR 1.56). None of these associations were observed among men.

Table 4: Variations in the reporting of key sexual health outcomes among Natsal-3 participants aged 17-34 by limiting disability status and gender

| Sexual health outcome                                   | WOMEN                                                     |                                                               |                                                                     |         | MEN                                                       |                                                               |                                                                     |         |
|---------------------------------------------------------|-----------------------------------------------------------|---------------------------------------------------------------|---------------------------------------------------------------------|---------|-----------------------------------------------------------|---------------------------------------------------------------|---------------------------------------------------------------------|---------|
|                                                         | % (95% CI) of those reporting no disability (n=3495/1983) | % (95% CI) of those reporting limiting disability (n=458/245) | AOR* (95% CI) for reporting outcome if reported limiting disability | p-value | % (95% CI) of those reporting no disability (n=2539/2098) | % (95% CI) of those reporting limiting disability (n=247/186) | AOR* (95% CI) for reporting outcome if reported limiting disability | p-value |
| Experienced non-volitional sex                          | 6.9% (6.0-8.0)                                            | 19.5% (15.7-24.0)                                             | 3.08 (2.28-4.16)                                                    | <0.0001 | 1.3% (0.9-1.9)                                            | 2.1% (0.9-4.6)                                                | 1.57 (0.64-3.90)                                                    | 0.322   |
| Experienced attempted non-volitional sex                | 16.0% (14.7-17.4)                                         | 33.0% (28.3-38.1)                                             | 2.50 (1.96-3.19)                                                    | <0.0001 | 4.2% (3.4-5.2)                                            | 5.7% (3.3-9.7)                                                | 1.38 (0.73-2.60)                                                    | 0.321   |
| Ever diagnosed with a STI <sup>1</sup>                  | 37.8% (35.9-39.6)                                         | 47.2% (42.1-52.4)                                             | 1.52 (1.21-1.91)                                                    | 0.0003  | 13.0% (11.5-14.6)                                         | 12.4% (8.6-17.4)                                              | 0.89 (0.57-1.38)                                                    | 0.598   |
| Ever attended a sexual health (GUM) clinic <sup>2</sup> | 42.1% (40.1-44.1)                                         | 46.3% (41.2-51.6)                                             | 1.26 (1.01-1.58)                                                    | 0.044   | 35.0% (32.8-37.2)                                         | 35.7% (28.9-43.0)                                             | 1.04 (0.75-1.45)                                                    | 0.811   |
| Ever had a pregnancy that ended in an abortion          | 12.2% (11.0-13.4)                                         | 15.3% (12.0-19.1)                                             | 1.25 (0.92-1.68)                                                    | 0.148   |                                                           |                                                               |                                                                     |         |
| Distressed/worried about sex life                       | 10.9% (9.7-12.1)                                          | 16.7% (13.1-21.2)                                             | 1.61 (1.18-2.21)                                                    | 0.003   | 9.7% (8.5-11.0)                                           | 14.6% (10.3-20.2)                                             | 1.48 (0.97-2.26)                                                    | 0.068   |
| Sought help/advice for sex life, past year              | 25.2% (23.6-26.9)                                         | 33.8% (28.9-39.1)                                             | 1.56 (1.22-2.00)                                                    | 0.0004  | 19.6% (17.9-21.4)                                         | 18.5% (13.7-24.7)                                             | 1.01 (0.68-1.48)                                                    | 0.977   |

\*Odds ratio adjusted for age and social class

## Discussion

This paper presents the results of the analysis of a large-scale, nationally-representative survey, in which we explored whether sexual behaviour and sexual health outcomes differ between people with and without limiting disability. It is one of few quantitative studies to do so, and the only one we know of to date in Britain. Disability that limited activities affected around one in ten people in this relatively young age group (17-34 years). Around three-quarters of respondents with a limiting disability reported having one or more physical and/or mental health conditions. The main finding from these analyses is that, while young adults with disabilities in Britain report broadly similar sexual behaviour to young adults without disabilities, they are more likely to experience adverse sexual health outcomes. This is especially so for women. Of note, women with limiting disability were significantly more likely to have experienced sex against their will, STI diagnosis/es, an earlier sexual debut, and lack 'sexual competence' at first sex, including less frequent use of reliable contraception. While we did not find these associations for men, both women and men with limiting disability were more likely to report greater distress and less satisfaction with their sex lives than their peers.

There are relatively few comparable studies available, and none reporting on a British population. In the US, the Minnesota Adolescent Health study found few differences in sexual behaviours among young people with and without chronic physical conditions but, like our study, found poorer outcomes among those with chronic conditions including a higher proportion who had a history of sexual abuse and STI diagnosis [28]. The US National Longitudinal Study of Adolescent Health found that physically disabled young people were as likely to be sexually active as their peers, but that young women with physical disabilities were more vulnerable to non-consensual sex [29]. Our findings support existing evidence that women with disabilities are a group at higher risk of experiencing non-volitional sex [16], sexual assault [30-32] and intimate partner violence [31-33].

Our finding that people with limiting disability experience more distress and less satisfaction with their sex lives may be due to people with severe physical illnesses experiencing sexual difficulties as a direct result of their condition [14]. Other studies, including qualitative

1  
2  
3 research, have reported higher levels of dissatisfaction or distress about sex life among  
4 people with disabilities which suggests that people with physical disability have the same  
5 sexual needs and desires as people without disability, but that their body image, sexual  
6 self-esteem, sexual satisfaction and life satisfaction may be lower [5,34].  
7  
8  
9

10  
11 In women with limiting disability, we also observed a shorter time between meeting and  
12 first sex with their most recent partner than in women with no limiting disability. Previous  
13 research on stereotypes associated with disability and sexuality suggests that a woman who  
14 feels sexually disenfranchised or who has lower sexual esteem as a result of her disability  
15 may be more likely to have sex with a partner with whom she is less emotionally invested  
16 [35-37]. However, having sex with someone soon after meeting may not, in itself, be a  
17 negative outcome if the experience is mutually-desired, safe, pleasurable, free of coercion,  
18 discrimination and violence [4]. Nonetheless, this may not always be the case given the  
19 higher prevalence of adverse sexual health outcomes for young adults with limiting  
20 disability observed in the Natsal-3.  
21  
22  
23  
24  
25  
26  
27  
28  
29

30 There are limitations that need to be taken into consideration when interpreting the results  
31 from our study. Natsal-3 achieved a response rate of 57.7% overall in line with other major  
32 social surveys completed in Britain around the same time [38,39], although the response  
33 rate was higher among young people, this paper's study population [24]. Non-response  
34 weighting was used such that the data broadly reflect the distribution of key demographic  
35 variables according to census data, however, selection bias is a potential issue. In this  
36 respect, it is important to acknowledge that Natsal-3's sampling frame meant that only  
37 people resident in private households in Britain were sampled, excluding people living in  
38 institutions who may be more likely to have limiting disabilities. In addition, despite Natsal-  
39 3's large sample size (including over-sampling people in our study's age range), a relatively  
40 small proportion of participants were of non-white British ethnicity reflecting Britain's  
41 ethnic composition[40]. Unlike Natsal-2,[41] Natsal-3 did not oversample ethnic minorities,  
42 therefore limiting the power to detect ethnic differences as reflected in some wide  
43 confidence intervals, and requiring us to use broad categories of self-reported ethnicity (e.g.  
44 Black/Black British) in which there exists great heterogeneity.  
45  
46  
47  
48  
49  
50  
51  
52  
53  
54  
55  
56  
57  
58  
59  
60

1  
2  
3 A strength of Natsal-3 is that it used CAPI and specifically CASI to minimise reporting bias for  
4 the more sensitive questions. Nonetheless the data are self-reported, which are subject to  
5 recall and social desirability bias. Further, as a cross-sectional survey, chronology cannot  
6 always be determined and nor can causality in the associations we show be inferred. We  
7 have no information about the duration of disability, and whether or not, for example, a  
8 participant's disability preceded their first heterosexual intercourse. We restricted our  
9 analysis to focus on people with limiting disability in line with national and international  
10 legislation and policy[1,22] and so have not included those who considered their disability  
11 as non-limiting. While those with non-limiting disability could be explored in a future  
12 analysis, it is worth noting that earlier analyses of Natsal-3 considered the associations  
13 between general health status and measures of sexual behaviour and sexual well-being[17].  
14  
15  
16  
17  
18  
19  
20  
21  
22

23 The study included people who considered themselves to have a limiting disability rather  
24 than focussing specifically on people with particular impairment types e.g. sensory  
25 impairment, as is the case in most previous studies [9,14,42]. However, there is a lack of  
26 information on the nature and severity of the impairment underlying the disability, which  
27 could help us further elucidate the relationship between disability and sexual health. In an  
28 attempt to provide context, we presented data on a number of health conditions and  
29 considered how this varied according to whether or not participants perceived themselves  
30 to have a limiting disability. Both mental and physical health conditions were more  
31 commonly reported by people with limiting disability than those without, supporting our  
32 use of this measure of disability. However it was not possible to determine whether a  
33 participant's limiting disability was as a result, even in part, of the conditions reported, or  
34 whether these conditions were experienced in addition to their limiting disability.  
35  
36  
37  
38  
39  
40  
41  
42  
43  
44  
45

46 Our findings have important implications for policy and practice. Firstly, limiting disability  
47 was common in this relatively young age group and, for the most part, sexual behaviour of  
48 people with disabilities was similar to that among those without disability. This points to the  
49 need for young people with limiting disabilities to be represented and included in sexual  
50 health promotion alongside their contemporaries. Secondly, that some negative outcomes  
51 are more commonly reported by this group, suggests that targeted efforts are also needed,  
52 which may need to be newly developed as they are currently lacking. Of note, non-volitional  
53  
54  
55  
56  
57  
58  
59  
60

1  
2  
3 sex, which may need targeted policy and programme interventions. Sexual assault is  
4 frequently unreported to the police or authorities and research has shown that reporting is  
5 even less likely among people with a disability [43]. When a report is made, support  
6 following sexual assault neither targets the circumstances of, nor meets the needs of,  
7 people with disability [43-46]. Interventions for distress about sex lives may also require  
8 targeted policy and programme interventions. These should include awareness raising  
9 and/or educational interventions for health professionals, as evidence suggests a reluctance  
10 or failure to discuss sex with individuals with disabilities as it is not seen as pertinent [9] or  
11 aspects of the clinical, institutional and broader social environments may undermine their  
12 ability to promote sexual health [47]. The study findings and recommendations will be of  
13 interest to disabled people's organisations and sexual health advocates, as well as policy  
14 makers and health professionals. There are also implications for further research, including  
15 the need for qualitative research to understand the relationship between experiencing  
16 disability, distress, and satisfaction about sex.  
17  
18  
19  
20  
21  
22  
23  
24  
25  
26  
27  
28  
29  
30  
31  
32  
33  
34  
35  
36  
37  
38  
39  
40  
41  
42  
43  
44  
45  
46  
47  
48  
49  
50  
51  
52  
53  
54  
55  
56  
57  
58  
59  
60

### Competing interest statement

All authors have completed the ICMJE uniform disclosure form at [www.icmje.org/coi\\_disclosure.pdf](http://www.icmje.org/coi_disclosure.pdf) and declare: no support from any organisation for the submitted work; no financial relationships with any organisations that might have an interest in the submitted work in the previous three years; no other relationships or activities that could appear to have influenced the submitted work.

### Contributors

EH conceived the study. EH, CM, CT, HK, JD, and WM contributed to the design of the study. VT and CT conducted analysis of the data, and all authors contributed to the interpretation of the data. EH drafted the article, and it was critically revised for important intellectual content by EH, CM, CT, HK, JD, and WM. All authors contributed to the final approval of the version to be published. All authors had full access to all the data (including statistical reports and tables) in the study and can take responsibility for the integrity of the data and the accuracy of the data analysis.

### Data sharing statement

The Natsal-3 dataset has been archived at the UK Data Archive at the University of Essex and is accessible by academic researchers.

## References

- [1] UN Division for Social Policy and Development Disability. Convention on the Rights of Persons with Disabilities (CRPD). [Internet]. UN; 2018. Available from: <https://www.un.org/development/desa/disabilities/convention-on-the-rights-of-persons-with-disabilities.html>
- [2] WHO. World report on disability [Internet]. WHO; 2011. Available from: [http://www.who.int/disabilities/world\\_report/2011/en/](http://www.who.int/disabilities/world_report/2011/en/)
- [3] Pensions D for W and. Disability prevalence estimates 2002/03 to 2011/12 (Apr to Mar) [Internet]. 2014. Available from: <https://www.gov.uk/government/statistics/disability-prevalence-estimates-200203-to-201112-apr-to-mar>
- [4] WHO. Defining sexual health: report of a technical consultation on sexual health, 28–31 January 2002, Geneva [Internet]. 2006. Available from: [http://www.who.int/reproductivehealth/publications/sexual\\_health/defining\\_sexual\\_health.pdf](http://www.who.int/reproductivehealth/publications/sexual_health/defining_sexual_health.pdf)
- [5] Moin V, Duvdevany I, Mazor D. Sexual Identity, Body Image and Life Satisfaction Among Women With and Without Physical Disability. *Sex Disabil* [Internet]. 2009;27(2):83–95. Available from: <http://dx.doi.org/10.1007/s11195-009-9112-5>
- [6] Shakespeare T. Disabled Sexuality: Toward Rights and Recognition. *Sex Disabil* [Internet]. 2000;18(3):159–66. Available from: <http://dx.doi.org/10.1023/A:1026409613684>
- [7] Liddiard K. The work of disabled identities in intimate relationships. *Disabil Soc* [Internet]. 2014;29(1):115–28. Available from: <http://dx.doi.org/10.1080/09687599.2013.776486>
- [8] Anderson P, Kitchin R. Disability, space and sexuality: access to family planning services1. *Soc Sci Med* [Internet]. 2000;51(8):1163–73. Available from: <http://www.sciencedirect.com/science/article/pii/S0277953600000198>
- [9] Young R, Gore N, McCarthy M. Staff attitudes towards sexuality in relation to gender of people with intellectual disability: A qualitative study. *J Intellect Dev Disabil* [Internet]. 2012;37(4):343–7. Available from: <http://www.tandfonline.com/doi/abs/10.3109/13668250.2012.704983>
- [10] Esmail S, Darry K, Walter A, Knupp H, Attitudes and perceptions towards disability and sexuality. *Disability and Rehabilitation*, 2010;32(14):1148-1155. Available from: <https://www.tandfonline.com/doi/full/10.3109/09638280903419277>
- [11] Shakespeare, T. & Richardson, S., (2018). The sexual politics of disability, twenty years on. *Scandinavian Journal of Disability Research*. 20(1), pp.82–91. Available from: <https://www.sjdr.se/articles/10.16993/sjdr.25/>
- [12] Diamond M. Sexuality and the handicapped. In: Orto PM and AD, editor. *The Psychological and Social Impact of Physical Disability*. New York: Springer Publishing; 1984.
- [13] Sexuality and Reproductive Health in Adults with Spinal Cord Injury: A Clinical Practice Guideline for Health-Care Professionals. *J Spinal Cord Med* [Internet]. 2010;33(3):281–336. Available from: <http://www.ncbi.nlm.nih.gov/pmc/articles/PMC2941243/>



- 1  
2  
3 [14] Lew-Starowicz M, Rola R. Prevalence of Sexual Dysfunctions Among Women with Multiple  
4 Sclerosis. *Sex Disabil* [Internet]. 2013;31(2):141–53. Available from:  
5 <http://www.ncbi.nlm.nih.gov/pmc/articles/PMC3659270/>  
6
- 7 [15] Verschuren JEA, Zhdanova MA, Geertzen JHB, Enzlin P, Dijkstra PU, Dekker R. Let's talk about  
8 sex: lower limb amputation, sexual functioning and sexual well-being: a qualitative study of the  
9 partner's perspective. *J Clin Nurs* [Internet]. 2013;22(23–24):3557–67. Available from:  
10 <http://dx.doi.org/10.1111/jocn.12433>  
11
- 12 [16] Macdowall W, Gibson LJ, Tanton C, Mercer CH, Lewis R, Clifton S, et al. Lifetime prevalence,  
13 associated factors, and circumstances of non-volitional sex in women and men in Britain: findings  
14 from the third National Survey of Sexual Attitudes and Lifestyles (Natsal-3). *Lancet* [Internet].  
15 382(9907):1845–55. Available from: [http://dx.doi.org/10.1016/S0140-6736\(13\)62300-4](http://dx.doi.org/10.1016/S0140-6736(13)62300-4)  
16
- 17 [17] Field N, Mercer CH, Sonnenberg P, Tanton C, Clifton S, Mitchell KR, et al. Associations between  
18 health and sexual lifestyles in Britain: findings from the third National Survey of Sexual Attitudes and  
19 Lifestyles (Natsal-3). *Lancet* [Internet]. 382(9907):1830–44. Available from:  
20 [http://dx.doi.org/10.1016/S0140-6736\(13\)62222-9](http://dx.doi.org/10.1016/S0140-6736(13)62222-9)  
21
- 22 [18] Sonnenberg P, Clifton S, Beddows S, Field N, Soldan K, Tanton C, et al. Prevalence, risk factors,  
23 and uptake of interventions for sexually transmitted infections in Britain: findings from the National  
24 Surveys of Sexual Attitudes and Lifestyles (Natsal). *Lancet* [Internet]. 2017 Aug 1;382(9907):1795–  
25 806. Available from: [http://dx.doi.org/10.1016/S0140-6736\(13\)61947-9](http://dx.doi.org/10.1016/S0140-6736(13)61947-9)  
26
- 27 [19] Wellings K, Jones KG, Mercer CH, Tanton C, Clifton S, Datta J, et al. The prevalence of unplanned  
28 pregnancy and associated factors in Britain: findings from the third National Survey of Sexual  
29 Attitudes and Lifestyles (Natsal-3). *Lancet* [Internet]. 2013 Nov 30;382(9907):1807–16. Available  
30 from: <http://www.ncbi.nlm.nih.gov/pmc/articles/PMC3898922/>  
31
- 32 [20] Health D of. Abortion Statistics, England and Wales: 2015. Summary information from the  
33 abortion notification forms returned to the Chief Medical Officers of England and Wales [Internet].  
34 2016. Available from:  
35 [https://www.gov.uk/government/uploads/system/uploads/attachment\\_data/file/570040/Updated\\_](https://www.gov.uk/government/uploads/system/uploads/attachment_data/file/570040/Updated_Abortion_Statistics_2015.pdf)  
36 [Abortion\\_Statistics\\_2015.pdf](https://www.gov.uk/government/uploads/system/uploads/attachment_data/file/570040/Updated_Abortion_Statistics_2015.pdf)  
37
- 38 [21] Erens B, Phelps A, Clifton S, Mercer CH, Tanton C, Hussey D, et al. Methodology of the third  
39 British National Survey of Sexual Attitudes and Lifestyles (Natsal-3). *Sex Transm Infect* [Internet].  
40 2013; Available from: <http://sti.bmj.com/content/early/2013/11/22/sextrans-2013-051359.abstract>  
41
- 42 [22] UK Government Definition of disability under the Equality Act 2010. Available from:  
43 <https://www.gov.uk/definition-of-disability-under-equality-act-2010>.  
44
- 45 [23] WHO. Towards a Common Language for Functioning, Disability and Health [Internet]. Geneva;  
46 2002. Available from: <http://www.who.int/classifications/icf/icfbeginnersguide.pdf>  
47
- 48 [24] Erens B, Phelps A, Clifton S, Hussey D, Mercer CH, Tanton C, et al. National Survey of Sexual  
49 Attitudes and Lifestyles 3. Technical Report. Volume 1: Methodology [Internet]. Available from:  
50 <http://www.natsal.ac.uk/media/2090/natsal-3-technical-report.pdf>  
51
- 52 [25] Office for National Statistics. Standard Occupational Classification 2010: volumes 1–3.  
53 Basingstoke: Palgrave Macmillan, 2010. Available from:  
54 <https://www.ons.gov.uk/methodology/classificationsandstandards/standardoccupationalclassification/soc/soc2010>  
55  
56  
57

- 1  
2  
3  
4 [26] Rupert Payne; Gary Abel. UK indices of multiple deprivation—a way to make comparisons across  
5 constituent countries easier. *Heal Stat Q*. 2012;53:22–37.
- 6  
7 [27] Wellings K, Nanchahal K, Macdowall W, McManus S, Erens B, Mercer CH, et al. Sexual behaviour  
8 in Britain: early heterosexual experience. *Lancet* [Internet]. 2001;358(9296):1843–50. Available  
9 from: <http://www.sciencedirect.com/science/article/pii/S0140673601068854>
- 10  
11 [28] Surís J-C, Resnick MD, Cassuto N, Blum RWM. Sexual behavior of adolescents with chronic  
12 disease and disability. *J Adolesc Heal* [Internet]. 1996;19(2):124–31. Available from:  
13 <http://www.sciencedirect.com/science/article/pii/1054139X9500282W>
- 14  
15 [29] Cheng MM, Udry JR. Sexual behaviors of physically disabled adolescents in the United States. *J*  
16 *Adolesc Heal* [Internet]. 2002;31(1):48–58. Available from:  
17 <http://www.sciencedirect.com/science/article/pii/S1054139X01004001>
- 18  
19 [30] Martin SL, Ray N, Sotres-Alvarez D, Kupper LL, Moracco KE, Dickens PA, et al. Physical and sexual  
20 assault of women with disabilities. *Violence Against Women* [Internet]. 2006;12(9):823–37. Available  
21 from: [https://www.scopus.com/inward/record.uri?eid=2-s2.0-](https://www.scopus.com/inward/record.uri?eid=2-s2.0-33747081336&doi=10.1177%2F1077801206292672&partnerID=40&md5=192e199ab184dad433e65982850e441f)  
22 [33747081336&doi=10.1177%2F1077801206292672&partnerID=40&md5=192e199ab184dad433e65](https://www.scopus.com/inward/record.uri?eid=2-s2.0-33747081336&doi=10.1177%2F1077801206292672&partnerID=40&md5=192e199ab184dad433e65982850e441f)  
23 [982850e441f](https://www.scopus.com/inward/record.uri?eid=2-s2.0-33747081336&doi=10.1177%2F1077801206292672&partnerID=40&md5=192e199ab184dad433e65982850e441f)
- 24  
25 [31] Lin L-P, Yen C-F, Kuo F-Y, Wu J-L, Lin J-D. Sexual assault of people with disabilities: Results of a  
26 2002–2007 national report in Taiwan. *Res Dev Disabil* [Internet]. 2009;30(5):969–75. Available from:  
27 <http://www.sciencedirect.com/science/article/pii/S0891422209000262>
- 28  
29 [32] M. Schröttle SG. Intimate Partner Violence Against Disabled Women as a Part of Widespread  
30 Victimization and Discrimination over the Lifetime: Evidence from a German Representative Study. *Int J Conf Violence*. 2013;7(2):232–48.
- 31  
32  
33 [33] Barrett KA, O’Day B, Roche A, Carlson BL. Intimate Partner Violence, Health Status, and Health  
34 Care Access Among Women with Disabilities. *Women’s Heal Issues* [Internet]. 2009;19(2):94–100.  
35 Available from: <http://www.sciencedirect.com/science/article/pii/S1049386708001783>
- 36  
37 [34] Smith AE, Molton IR, McMullen K, Jensen MP. Sexual Function, Satisfaction, and Use of Aids for  
38 Sexual Activity in Middle-Aged Adults with Long-Term Physical Disability. *Top Spinal Cord Inj Rehabil*  
39 [Internet]. 2015;21(3):227–32. Available from:  
40 <http://www.ncbi.nlm.nih.gov/pmc/articles/PMC4568085/>
- 41  
42 [35] McCabe MP, Taleporos G. Sexual esteem, sexual satisfaction, and sexual behavior among people  
43 with physical disability. *Arch Sex Behav*. 2003 Aug;32(4):359–69.
- 44  
45 [36] Milligan MS, Neufeldt AH. The Myth of Asexuality: A Survey of Social and Empirical Evidence.  
46 *Sex Disabil* [Internet]. 2001;19(2):91–109. Available from:  
47 <https://doi.org/10.1023/A:1010621705591>
- 48  
49 [37] Taleporos G, McCabe MP. Relationships, sexuality and adjustment among people with physical  
50 disability. *Sex Relatsh Ther* [Internet]. 2003 Feb 1;18(1):25–43. Available from:  
51 <http://dx.doi.org/10.1080/1468199031000061245>
- 52  
53 [38] Craig R, Mindell J, Eds. *Health Survey for England 2010—volume 1: respiratory health*. Leeds;  
54 2011.
- 55  
56  
57  
58  
59  
60

- 1  
2  
3 [39] Park A, Clery E, Curtice J, Phillips M, Utting D. British social attitudes: the 28th report. London;  
4 2012.
- 5  
6 [40] Office for National Statistics. Ethnicity and National Identity in England and Wales: 2011.  
7 Available from:  
8 <https://www.ons.gov.uk/peoplepopulationandcommunity/culturalidentity/ethnicity/articles/ethnicityandnationalidentityinenglandandwales/2012-12-11>  
9
- 10  
11 [41] Fenton KA, Mercer CH, McManus S, et al. Ethnic variations in sexual behaviour in Great Britain  
12 and risk of sexually transmitted infections: a probability survey. *Lancet* 2005; **365**: 1246–55. Available  
13 from: <https://www.ncbi.nlm.nih.gov/pubmed/15811458>  
14
- 15 [42] Hughes K, Bellis MA, Jones L, Wood S, Bates G, Eckley L, et al. Prevalence and risk of violence  
16 against adults with disabilities: a systematic review and meta-analysis of observational studies.  
17 *Lancet* [Internet]. 379(9826):1621–9. Available from: [http://dx.doi.org/10.1016/S0140-](http://dx.doi.org/10.1016/S0140-6736(11)61851-5)  
18 6736(11)61851-5  
19
- 20 [43] Anderson ML, Leigh IW. Intimate Partner Violence Against Deaf Female College Students.  
21 *Violence Against Women* [Internet]. 2011 Jun 15;17(7):822–34. Available from:  
22 <http://dx.doi.org/10.1177/1077801211412544>  
23
- 24 [44] Nannini A. Sexual assault patterns among women with and without disabilities seeking survivor  
25 services. *Women's Health Issues* [Internet]. 2006;16(6):372–9. Available from:  
26 <http://www.sciencedirect.com/science/article/pii/S1049386706001101>  
27
- 28 [45] Obinna J, Krueger S, Sadusky J., DeVore W. Understanding the Needs of the Victims of Sexual  
29 Assault in the Deaf Community: A Needs Assessment and Audit [Internet]. 2005. Available from:  
30 <https://www.ncjrs.gov/pdffiles1/nij/grants/212867.pdf>  
31
- 32 [46] Nichols EM, Bonomi A, Kammes R, Miller E. Service seeking experiences of college-aged sexual  
33 and intimate partner violence victims with a mental health and/or behavioral disability. *Journal of*  
34 *American College Health*, 2018. DOI: 10.1080/07448481.2018.1440572. Available from:  
35 <https://www.tandfonline.com/doi/abs/10.1080/07448481.2018.1440572>  
36
- 37 [47] McCabe J, Holmes D. Nursing, sexual health and youth with disabilities: a critical ethnography. *J*  
38 *Adv Nurs*, 2014; 70(1):77-86. doi: 10.1111/jan.12167. Available from:  
39 <https://www.ncbi.nlm.nih.gov/pubmed/23627581>  
40  
41  
42  
43  
44  
45  
46  
47  
48  
49  
50  
51  
52  
53  
54  
55  
56  
57  
58  
59  
60

Supplementary table: Health conditions reported by people with limiting disability compared to no disability among Natsal-3 participants aged 17-34, stratified by gender

|                                                        | WOMEN                                         |                                                     |                                                                       |          | MEN                                           |                                                     |                                                                                |          |
|--------------------------------------------------------|-----------------------------------------------|-----------------------------------------------------|-----------------------------------------------------------------------|----------|-----------------------------------------------|-----------------------------------------------------|--------------------------------------------------------------------------------|----------|
| <i>Denominators</i>                                    | 3495/1983                                     | 458/245                                             |                                                                       |          | 2539/2098                                     | 247/186                                             |                                                                                |          |
|                                                        | % (95% C.I.) of those reporting no disability | % (95% C.I.) of those reporting limiting disability | AOR* (95% C.I.) for reporting outcome if reported limiting disability | p-value  | % (95% C.I.) of those reporting no disability | % (95% C.I.) of those reporting limiting disability | AOR* (95% C.I.) for reporting outcome if reported limiting disability 95% C.I. | p-value  |
| <i>≥ 1 mental health condition</i>                     |                                               |                                                     |                                                                       |          |                                               |                                                     |                                                                                |          |
| Yes                                                    | 16.1 (14.8-17.5)                              | 49.8 (44.7-54.9)                                    | 5.19 (4.14-6.50)                                                      | p<0.0001 | 11.5 (10.2-13.0)                              | 44.6 (37.1-52.4)                                    | 6.25 (4.44-8.81)                                                               | p<0.0001 |
| No                                                     | 83.9 (82.5-85.22)                             | 50.2 (45.11-55.3)                                   |                                                                       |          | 88.5 (86.98-89.83)                            | 55.4 (47.66-62.89)                                  |                                                                                |          |
| Treated for depression in past year                    | 7.6 (6.7-8.5)                                 | 38.0 (33.3-43.0)                                    | 7.48 (5.85-9.55)                                                      | p<0.0001 | 2.6 (2.0-3.4)                                 | 22.4 (17.4-28.3)                                    | 10.12 (6.68-15.33)                                                             | p<0.0001 |
| Treated for other mental health condition in past year | 1.2 (0.8-1.8)                                 | 15.5 (12.0-19.7)                                    | 14.84 (8.99-24.49)                                                    | p<0.0001 | 1.2 (0.8-1.7)                                 | 18.0 (13.4-23.8)                                    | 17.4 (10.21-29.64)                                                             | p<0.0001 |
| Screen positive for current depression                 | 9.7 (8.7-10.8)                                | 24.8 (20.7-29.4)                                    | 3.18 (2.44-4.14)                                                      | p<0.0001 | 8.8 (7.6-10.1)                                | 28.9 (21.7-37.3)                                    | 4.49 (2.97-6.79)                                                               | p<0.0001 |
| <i>≥ 1 physical health condition</i>                   |                                               |                                                     |                                                                       |          |                                               |                                                     |                                                                                |          |
| Yes                                                    | 9.7 (8.6-10.8)                                | 52.3 (47.3-57.3)                                    | 10.26 (8.10-13.01)                                                    | p<0.0001 | 7.1 (6.1-8.4)                                 | 50.4 (43.2-57.6)                                    | 12.67 (9.06-17.73)                                                             | p<0.0001 |
| No                                                     | 90.3 (89.17-91.39)                            | 47.7 (42.7-52.7)                                    |                                                                       |          | 92.9 (91.6-93.9)                              | 49.6 (42.4-56.8)                                    |                                                                                |          |

|                                                                                                   |                  |                  |                     |          |  |                  |                  |                      |          |
|---------------------------------------------------------------------------------------------------|------------------|------------------|---------------------|----------|--|------------------|------------------|----------------------|----------|
| Arthritis                                                                                         | 0.8 (0.6-1.2)    | 9.0 (6.4-12.6)   | 11.46 (6.79-19.32)  | p<0.0001 |  | 0.4 (0.2-0.8)    | 9.1 (4.3-18.4)   | 21.14 (7.45-60.02)   | p<0.0001 |
| Any cardiac or vascular disease                                                                   | 0.1 (0.1-0.3)    | 1.7 (0.9-3.5)    | 14.89 (5.19-42.76)  | p<0.0001 |  | 0.4 (0.1-0.8)    | 4.2 (2.2-8.0)    | 12.08 (4.06-35.91)   | p<0.0001 |
| Hypertension                                                                                      | 1.8 (1.4-2.4)    | 5.0 (3.1-8.0)    | 2.78 (1.56-4.95)    | 0.0006   |  | 0.9 (0.6-1.5)    | 3.1 (1.5-6.4)    | 2.9 (1.20-7.02)      | 0.0183   |
| Diabetes                                                                                          | 0.5 (0.3-0.9)    | 4.1 (2.6-6.5)    | 7.48 (3.75-14.92)   | p<0.0001 |  | 0.2 (0.1-0.6)    | 1.9 (0.7-4.5)    | 9.12 (2.11-39.42)    | 0.0031   |
| Epilepsy                                                                                          | 0.3 (0.2-0.6)    | 5.3 (3.5-8.0)    | 16.68 (8.11-34.30)  | p<0.0001 |  | 0.4 (0.2-0.8)    | 7.7 (4.8-12.3)   | 21.09 (8.94-49.79)   | p<0.0001 |
| Chronic airways disease                                                                           | 0.0 (0.0-0.2)    | 0.8 (0.3-2.3)    | 29.43 (3.07-282.03) | 0.0034   |  | 0.0 (0.0-0.2)    | 0.3 (0.0-1.9)    | 12.5 (1.42-110.12)   | 0.0229   |
| Backache, or bone or muscle disease for >3 months, past year                                      | 5.8 (5.0-6.8)    | 24.9 (20.8-29.5) | 5.3 (4.01-7.01)     | p<0.0001 |  | 4.8 (4.0-5.8)    | 24.0 (17.4-32.2) | 5.83 (3.70-9.17)     | p<0.0001 |
| Difficulty walking up a flight of stairs because of a health problem ['much difficulty'/'unable'] | 1.1 (0.8-1.6)    | 28.3 (23.9-33.2) | 33.75 (22.59-50.43) | p<0.0001 |  | 0.5 (0.3-1.0)    | 28.5 (21.8-36.3) | 70.73 (36.33-137.71) | p<0.0001 |
| <i>≥ 1 physical and/or mental health condition</i>                                                |                  |                  |                     |          |  |                  |                  |                      |          |
| Both                                                                                              | 3.0 (2.4-3.7)    | 25.5 (21.4-30.0) | 11.04 (8.03-15.19)  | p<0.0001 |  | 1.5 (1.1-2.1)    | 23.4 (16.6-31.9) | 18.75 (10.96-32.08)  | p<0.0001 |
| <i>≥ 1 mental health condition only</i>                                                           | 13.1 (11.9-14.4) | 24.2 (20.0-29.0) | 2.14 (1.64-2.78)    | p<0.0001 |  | 10.0 (8.8-11.4)  | 21.2 (16.2-27.3) | 2.53 (1.76-3.65)     | p<0.0001 |
| <i>≥ 1 physical health condition only</i>                                                         | 7.1 (6.2-8.1)    | 26.8 (22.5-31.7) | 4.78 (3.61-6.32)    | p<0.0001 |  | 5.8 (4.8-7.0)    | 27.2 (21.3-34.0) | 5.65 (3.85-8.30)     | p<0.0001 |
| Either                                                                                            | 76.8 (75.2-78.4) | 23.5 (19.3-28.2) | 0.09 (0.07-0.12)    | p<0.0001 |  | 82.7 (80.9-84.3) | 28.2 (22.1-35.2) | 0.08 (0.06-0.12)     | p<0.0001 |
| <i>2+ physical and/or mental health</i>                                                           |                  |                  |                     |          |  |                  |                  |                      |          |

1  
2  
3  
4  
5  
6  
7  
8  
9  
10  
11  
12  
13  
14  
15  
16  
17  
18  
19  
20  
21  
22  
23  
24  
25  
26  
27  
28  
29  
30  
31  
32  
33  
34  
35  
36  
37  
38  
39  
40  
41  
42  
43  
44  
45  
46

|                                |                  |                  |                  |          |                  |                  |                  |          |  |
|--------------------------------|------------------|------------------|------------------|----------|------------------|------------------|------------------|----------|--|
| <i>conditions</i> <sup>1</sup> |                  |                  |                  |          |                  |                  |                  |          |  |
| Yes                            | 3.8 (3.1-4.6)    | 40.6 (35.8-45.7) | 19.2 (14.1-26.2) | p<0.0001 | 2.1 (1.6-2.8)    | 39.9 (32.7-47.6) | 42.3 (24.8-69.5) | p<0.0001 |  |
| No                             | 96.2 (95.4-96.9) | 59.4 (54.3-64.3) |                  |          | 97.9 (97.2-98.4) | 60.1 (52.4-67.4) |                  |          |  |

<sup>1</sup>For the purposes of this variable was classified as *either* screen positive for current depression *or* reporting treatment for depression in the past year

\*Age-adjusted odds ratio

For peer review only

STROBE Statement—Checklist of items that should be included in reports of *cross-sectional studies*

|                              | <b>Item No</b> | <b>Recommendation</b>                                                                                                                                                                                                                                                                                                                                                         |
|------------------------------|----------------|-------------------------------------------------------------------------------------------------------------------------------------------------------------------------------------------------------------------------------------------------------------------------------------------------------------------------------------------------------------------------------|
| <b>Title and abstract</b>    | 1              | (a) Indicate the study's design with a commonly used term in the title or the abstract - Pg 1<br>(b) Provide in the abstract an informative and balanced summary of what was done and what was found - Pg 2                                                                                                                                                                   |
| <b>Introduction</b>          |                |                                                                                                                                                                                                                                                                                                                                                                               |
| Background/rationale         | 2              | Explain the scientific background and rationale for the investigation being reported - Pg 5                                                                                                                                                                                                                                                                                   |
| Objectives                   | 3              | State specific objectives, including any prespecified hypotheses - Pg 5-6                                                                                                                                                                                                                                                                                                     |
| <b>Methods</b>               |                |                                                                                                                                                                                                                                                                                                                                                                               |
| Study design                 | 4              | Present key elements of study design early in the paper - Pg 6-7                                                                                                                                                                                                                                                                                                              |
| Setting                      | 5              | Describe the setting, locations, and relevant dates, including periods of recruitment, exposure, follow-up, and data collection - Pg 6-7                                                                                                                                                                                                                                      |
| Participants                 | 6              | (a) Give the eligibility criteria, and the sources and methods of selection of participants - Pg 6                                                                                                                                                                                                                                                                            |
| Variables                    | 7              | Clearly define all outcomes, exposures, predictors, potential confounders, and effect modifiers. Give diagnostic criteria, if applicable - Pg 6-8                                                                                                                                                                                                                             |
| Data sources/<br>measurement | 8*             | For each variable of interest, give sources of data and details of methods of assessment (measurement). Describe comparability of assessment methods if there is more than one group - Pg 6-8                                                                                                                                                                                 |
| Bias                         | 9              | Describe any efforts to address potential sources of bias - Pg 6                                                                                                                                                                                                                                                                                                              |
| Study size                   | 10             | Explain how the study size was arrived at - N/A                                                                                                                                                                                                                                                                                                                               |
| Quantitative variables       | 11             | Explain how quantitative variables were handled in the analyses. If applicable, describe which groupings were chosen and why - Pg 7                                                                                                                                                                                                                                           |
| Statistical methods          | 12             | (a) Describe all statistical methods, including those used to control for confounding. - Pg 7-8<br>(b) Describe any methods used to examine subgroups and interactions - N/A<br>(c) Explain how missing data were addressed - N/A<br>(d) If applicable, describe analytical methods taking account of sampling strategy - Pg 7<br>(e) Describe any sensitivity analyses - N/A |
| <b>Results</b>               |                |                                                                                                                                                                                                                                                                                                                                                                               |
| Participants                 | 13*            | (a) Report numbers of individuals at each stage of study—eg numbers potentially eligible, examined for eligibility, confirmed eligible, included in the study, completing follow-up, and analysed – Pg 8-9, Table 1<br>(b) Give reasons for non-participation at each stage - N/A<br>(c) Consider use of a flow diagram- N/A                                                  |
| Descriptive data             | 14*            | (a) Give characteristics of study participants (eg demographic, clinical, social) and information on exposures and potential confounders - Pg 8-9, table 1 and supplementary table<br>(b) Indicate number of participants with missing data for each variable of interest - N/A                                                                                               |
| Outcome data                 | 15*            | Report numbers of outcome events or summary measures -Pg 8-9, Tables 1,2,3,4, and Supplementary                                                                                                                                                                                                                                                                               |
| Main results                 | 16             | (a) Give unadjusted estimates and, if applicable, confounder-adjusted estimates and                                                                                                                                                                                                                                                                                           |

|                          |    |                                                                                                                                                                                    |
|--------------------------|----|------------------------------------------------------------------------------------------------------------------------------------------------------------------------------------|
|                          |    | their precision (eg, 95% confidence interval). Make clear which confounders were adjusted for and why they were included - Tables 1,2,3,4, and Supplementary                       |
|                          |    | (b) Report category boundaries when continuous variables were categorized - N/A                                                                                                    |
|                          |    | (c) If relevant, consider translating estimates of relative risk into absolute risk for a meaningful time period - N/A                                                             |
| Other analyses           | 17 | Report other analyses done—eg analyses of subgroups and interactions, and sensitivity analyses - N/A                                                                               |
| <b>Discussion</b>        |    |                                                                                                                                                                                    |
| Key results              | 18 | Summarise key results with reference to study objectives - Pg 11                                                                                                                   |
| Limitations              | 19 | Discuss limitations of the study, taking into account sources of potential bias or imprecision. Discuss both direction and magnitude of any potential bias - Pg 12-13              |
| Interpretation           | 20 | Give a cautious overall interpretation of results considering objectives, limitations, multiplicity of analyses, results from similar studies, and other relevant evidence – Pg 14 |
| Generalisability         | 21 | Discuss the generalisability (external validity) of the study results - Pg 11                                                                                                      |
| <b>Other information</b> |    |                                                                                                                                                                                    |
| Funding                  | 22 | Give the source of funding and the role of the funders for the present study and, if applicable, for the original study on which the present article is based - Pg 8               |

\*Give information separately for exposed and unexposed groups.

**Note:** An Explanation and Elaboration article discusses each checklist item and gives methodological background and published examples of transparent reporting. The STROBE checklist is best used in conjunction with this article (freely available on the Web sites of PLoS Medicine at <http://www.plosmedicine.org/>, Annals of Internal Medicine at <http://www.annals.org/>, and Epidemiology at <http://www.epidem.com/>). Information on the STROBE Initiative is available at [www.strobe-statement.org](http://www.strobe-statement.org).
