# Supplementary material for: Sexual behaviours and sexual health outcomes among young adults with limiting disabilities: findings from third British National Survey of Sexual Attitudes and Lifestyles (Natsal-3)
Source: PubMed Central journal article supplement (PMC6124606; doi:10.1136/bmjopen-2017-019219), 2018-07-05
Supplement: bmjopen-2017-019219supp001.pdf [file bmjopen-2017-019219supp001.pdf]

Supplementary table: Health conditions reported by people with limiting disability compared to no disability among Natsal-3 participants aged 17-34, stratified by gender

|                                                        | WOMEN                                         |                                                     |                                                                       |          | MEN                                           |                                                     |                                                                                |          |
|--------------------------------------------------------|-----------------------------------------------|-----------------------------------------------------|-----------------------------------------------------------------------|----------|-----------------------------------------------|-----------------------------------------------------|--------------------------------------------------------------------------------|----------|
| <i>Denominators</i>                                    | 3495/1983                                     | 458/245                                             |                                                                       |          | 2539/2098                                     | 247/186                                             |                                                                                |          |
|                                                        | % (95% C.I.) of those reporting no disability | % (95% C.I.) of those reporting limiting disability | AOR* (95% C.I.) for reporting outcome if reported limiting disability | p-value  | % (95% C.I.) of those reporting no disability | % (95% C.I.) of those reporting limiting disability | AOR* (95% C.I.) for reporting outcome if reported limiting disability 95% C.I. | p-value  |
| <i>≥ 1 mental health condition</i>                     |                                               |                                                     |                                                                       |          |                                               |                                                     |                                                                                |          |
| Yes                                                    | 16.1 (14.8-17.5)                              | 49.8 (44.7-54.9)                                    | 5.19 (4.14-6.50)                                                      | p<0.0001 | 11.5 (10.2-13.0)                              | 44.6 (37.1-52.4)                                    | 6.25 (4.44-8.81)                                                               | p<0.0001 |
| No                                                     | 83.9 (82.5-85.22)                             | 50.2 (45.11-55.3)                                   |                                                                       |          | 88.5 (86.98-89.83)                            | 55.4 (47.66-62.89)                                  |                                                                                |          |
| Treated for depression in past year                    | 7.6 (6.7-8.5)                                 | 38.0 (33.3-43.0)                                    | 7.48 (5.85-9.55)                                                      | p<0.0001 | 2.6 (2.0-3.4)                                 | 22.4 (17.4-28.3)                                    | 10.12 (6.68-15.33)                                                             | p<0.0001 |
| Treated for other mental health condition in past year | 1.2 (0.8-1.8)                                 | 15.5 (12.0-19.7)                                    | 14.84 (8.99-24.49)                                                    | p<0.0001 | 1.2 (0.8-1.7)                                 | 18.0 (13.4-23.8)                                    | 17.4 (10.21-29.64)                                                             | p<0.0001 |
| Screen positive for current depression                 | 9.7 (8.7-10.8)                                | 24.8 (20.7-29.4)                                    | 3.18 (2.44-4.14)                                                      | p<0.0001 | 8.8 (7.6-10.1)                                | 28.9 (21.7-37.3)                                    | 4.49 (2.97-6.79)                                                               | p<0.0001 |
| <i>≥ 1 physical health condition</i>                   |                                               |                                                     |                                                                       |          |                                               |                                                     |                                                                                |          |
| Yes                                                    | 9.7 (8.6-10.8)                                | 52.3 (47.3-57.3)                                    | 10.26 (8.10-13.01)                                                    | p<0.0001 | 7.1 (6.1-8.4)                                 | 50.4 (43.2-57.6)                                    | 12.67 (9.06-17.73)                                                             | p<0.0001 |
| No                                                     | 90.3 (89.17-91.39)                            | 47.7 (42.7-52.7)                                    |                                                                       |          | 92.9 (91.6-93.9)                              | 49.6 (42.4-56.8)                                    |                                                                                |          |



|                                |                  |                  |                  |          |                  |                  |                  |          |  |
|--------------------------------|------------------|------------------|------------------|----------|------------------|------------------|------------------|----------|--|
| <i>conditions</i> <sup>1</sup> |                  |                  |                  |          |                  |                  |                  |          |  |
| Yes                            | 3.8 (3.1-4.6)    | 40.6 (35.8-45.7) | 19.2 (14.1-26.2) | p<0.0001 | 2.1 (1.6-2.8)    | 39.9 (32.7-47.6) | 42.3 (24.8-69.5) | p<0.0001 |  |
| No                             | 96.2 (95.4-96.9) | 59.4 (54.3-64.3) |                  |          | 97.9 (97.2-98.4) | 60.1 (52.4-67.4) |                  |          |  |

<sup>1</sup>For the purposes of this variable was classified as *either* screen positive for current depression *or* reporting treatment for depression in the past year

\*Age-adjusted odds ratio
